# 1           **Social connectedness as a determinant of mental health: A scoping review**

2   Priya J. Wickramaratne<sup>1,2</sup>, Tenzin Yangchen<sup>2</sup>, Lauren Lepow<sup>3</sup>, Braja G. Patra<sup>4</sup>, Benjamin Glicksburg<sup>3</sup>, Ardesheer  
3   Talati<sup>1,2</sup>, Prakash Adekkanattu<sup>5</sup>, Euijung Ryu<sup>6</sup>, Joanna M. Biernacka<sup>6</sup>, Alexander Charney<sup>3</sup>, J. John Mann<sup>7</sup>,  
4   Jyotishman Pathak<sup>4</sup>, Mark Olfson<sup>1</sup>, Myrna M. Weissman<sup>1,2</sup>

5   <sup>1</sup> Department of Psychiatry, Vagelos College of Physicians and Surgeons, Columbia University Irving Medical  
6   Center, New York, NY, United States of America

7   <sup>2</sup>Division of Translational Epidemiology, New York State Psychiatric Institute, New York, NY, United States of  
8   America

9   <sup>3</sup>Departments of Psychiatry and Genetics & Genomic Sciences, Icahn School of Medicine at Mount Sinai, New  
10   York, NY, United States of America

11   <sup>4</sup>Division of Health Informatics, Department of Population Health Sciences, Weill Cornell Medicine, New York,  
12   NY, United States of America

13   <sup>5</sup>Department of Information Technologies and Services, Weill Cornell Medicine, New York, NY, USA

14   <sup>6</sup>Department of Health Sciences Research, Mayo Clinic, Rochester, MN, United States of America

15   <sup>7</sup>Division of Molecular Imaging and the Neuropathology, New York State Psychiatric Institute, Departments of  
16   Psychiatry and Radiology, Vagelos College of Physicians and Surgeons, Columbia University Irving Medical  
17   Center, New York, NY, United States of America

18   \*Corresponding Author

19           E-mail: [priya.wickramaratne@nyspi.columbia.edu](mailto:priya.wickramaratne@nyspi.columbia.edu) (PJW)

20  
21  
22  
23  
24  
25

## 26 **Abstract**

27 Public health and epidemiologic research have established that social connectedness promotes overall health. Yet  
28 there have been no recent reviews of findings from research examining social connectedness as a determinant of  
29 mental health. The goal of this review was to evaluate recent longitudinal research probing the effects of social  
30 connectedness on depression and anxiety symptoms and diagnoses in the general population. A scoping review was  
31 performed of PubMed and PsychInfo databases from January 2015 to December 2020 following PRISMA-ScR  
32 guidelines using a defined search strategy. The search yielded 56 articles representing 52 unique studies. In research  
33 with other than pregnant women, 84% (16 of 19) studies reported that social support benefited symptoms of  
34 depression with the remaining 16% (3 of 19) reporting minimal or no evidence that lower levels of social support  
35 predict depression at follow-up. In research with pregnant women, 80% (21 of 26 studies) found that low social  
36 support increased postpartum depressive symptoms. Among 3 of 4 studies that focused on loneliness, feeling lonely  
37 at baseline was related to adverse outcomes at follow-up including higher risks of major depressive disorder,  
38 depressive symptom severity, generalized anxiety disorder, and lower levels of physical activity. In 5 of 7 reports,  
39 smaller social network size predicted depressive symptoms or disorder at follow-up. In summary, most recent  
40 relevant longitudinal studies have demonstrated that social support protects adults in the general population from  
41 depressive symptoms and disorders. The results, which were largely consistent across settings, exposure measures,  
42 and populations, support efforts to improve clinical detection of high-risk patients, including adults with low social  
43 support and elevated loneliness.

44

45

46

47

48

49

50

51

## 52 **Introduction**

53 While there is no universally accepted definition of social connectedness, it generally denotes a combination of  
54 interrelated constructs spanning social support, social networks, and absence of perceived social isolation. There is a  
55 broad-based agreement in the public health and epidemiologic literature that social connectedness protects and  
56 promotes mental and physical health and decreases all-cause mortality [1-3]. Researchers in fields ranging from  
57 psychology and epidemiology to sociology have been aware of these findings for several decades, but its  
58 implications have only recently begun to be appreciated more widely [4]. A recent study that reviewed the  
59 associations between social determinants of health and mental health outcomes [5], did not include social  
60 connectedness as a social determinant of mental health.

61 In a recent study of 100,000 participants in the UK Biobank [6], frequency of confiding in others and visits with  
62 family and friends emerged from over 100 modifiable risk factors as the strongest predictor of depression. This  
63 suggests that social connections may have protective effects or may be modified by development of a mood  
64 disorder. There is now a social connection domain in the Epic Social Determinants of Health wheel included in  
65 Electronic Health Records used in many major health organizations.

66 In light of these developments, we decided to conduct a scoping review of the relevant literature published between  
67 2015 and 2020 to evaluate the extent to which social connection influences risk for depression and anxiety. We also  
68 sought to determine which aspects of social connections are most protective. Our review synthesizes recent literature  
69 on the various categories of social connection (social networks, perceived emotional support, and perceived social  
70 isolation) and their differential effects on depression and anxiety in specific populations. Because depression and  
71 anxiety can have adverse effects on social connections [7], we restricted our search to longitudinal/cohort studies  
72 from which appropriate temporal ordering that is necessary, although not sufficient, for causal inferences, can be  
73 established. We performed a scoping review of the literature published during the last five years addressing whether  
74 social connectedness is longitudinally associated with common mental health outcomes of depression and anxiety  
75 among adults.

## 76 **Methods**

77 Searches of PubMed and PsychInfo databases and inspection of reference lists of relevant papers published during  
78 January 2015 and December 2020 were conducted following the Preferred Reporting Items for Systematic Reviews  
79 and Meta-Analyses Extension for Scoping Review (PRISMA-ScR) guidelines. The databases were searched using  
80 the following search strategy: (((("social\* support \*" or "social\* isolation\*" or "social\* network\*") AND (Depression  
81 OR Anxiety)) AND ("2015/1/1"[Date - Publication]: "2020/12/31"[Date - Publication]))) AND (English  
82 [Language]). Figure 1 presents a flow diagram displaying the process of searching and selecting the studies.

### 83 **Search strategy and selection criteria**

84 For inclusion in the review, studies were required to meet the following criteria: (a) employed longitudinal/cohort  
85 study design; (b) published in peer-reviewed journals between the years 2015 and 2020 in English; (c) assessed  
86 social support, social networks, or social isolation as one of the main predictor variables; (d) the mental health  
87 outcomes analyzed in the articles had to be either depression or anxiety; and (e) recruited participants aged 18 years  
88 or older in the study.

89 Studies were excluded if: (a) the article did not report original data (e.g., the article was a theoretical paper, review  
90 paper, or meta-analysis); (b) social connectedness as operationalized in the review was not measured as a predictor  
91 variable; (c) the sample included participants with pre-existing health conditions (e.g., HIV, chronic disease, cancer,  
92 stroke, etc.) except mental health conditions that are generally comorbid with depression or anxiety; and (d) the  
93 study did not focus on adults.

### 94 **Data Extraction**

95 After removing irrelevant titles and duplicates, the remaining articles were reviewed with respect to the eligibility  
96 criteria. Two authors (TY and PW) scrutinized titles and abstracts, and full text articles potentially eligible for this  
97 review were obtained. Key information from included papers was initially extracted and tabulated by one author  
98 (TY). The accuracy of this information was independently verified by another co-author (PW). Discrepancies were  
99 resolved through consensus. The data extracted included basic descriptive information about the sample, study type,  
100 length of follow-up, relevant predictor and outcome measures, and main findings. In cases where the same parent  
101 study data were employed in more than one publication, the papers were considered one study. Due to the wide

102 variation in study designs and populations, we did not attempt meta-analysis, but rather provide a narrative synthesis  
103 of the main findings.

## 104 **Results**

105 The initial search yielded 15,497 articles, and 6,532 articles were retained after duplicates and irrelevant articles  
106 were removed. After title and abstract screening, 105 articles were assessed for eligibility. Among studies selected  
107 for full-text review, 45 articles were deemed ineligible and excluded for various reasons: 10 did not employ  
108 longitudinal study design, 6 recruited participants aged younger than 18 years, 11 did not assess social support,  
109 social networks, and/or social isolation as predictor variable, 16 did not have depression or anxiety as the main  
110 outcome variable, and 2 were not from peer-reviewed sources. The PRISMA flowchart (Fig. 1) provides further  
111 detail on reasons for exclusion. Therefore, a total of 56 articles representing 52 unique studies met inclusion criteria  
112 for this scoping review.

## 113 **Study Characteristics**

### 114 **Social Support**

115 A little over half of the recent articles on the effect of social support on depression addressed the issues of  
116 depression in pregnant women, while the rest addressed the association of social support with anxiety or depression,  
117 in a variety of populations, other than pregnant women. We begin our review with nonpregnant populations because  
118 the results are of broader general relevance.

#### 119 *Study Samples other than pregnant women*

120 Table 1a lists the 20 articles that reported quantitatively on the longitudinal effects of social support on depression or  
121 anxiety in samples other than pregnant women, but two papers reported on one study, resulting in a total of 19  
122 studies. The sample size of the included studies ranged between 86 and 7171 participants. Majority of the studies  
123 were conducted in North America (8 studies), and the remaining were from Europe (6 studies), Asia (2 studies), and  
124 Australia (2 studies). One study was international in scope and sampled students from 76 host countries. All studies  
125 followed up the cohorts for at least one to two years and eight for over two years.

126 *Assessing Depression / Anxiety and Social Support*

127 The nineteen included studies used a threshold score on a depression rating scale to measure depressive symptoms,  
128 and the Center for Epidemiological Studies Depression Scale was the most frequently utilized scale, being used in  
129 six of the studies. Other measures with established psychometric properties included in this Table were as follows:  
130 Patient Health Questionnaire-9, Geriatric Depression Scale, Inventory of Depressive Symptomatology, Symptom  
131 Checklist Core Depression Scale, and Brief Symptom Inventory. In order to assess anxiety and depressive  
132 symptoms, three studies [8,9,10] used the Hospital Anxiety and Depression Scale, and two [11,12] used Depression  
133 Anxiety Stress Scale. Additionally, one study [13,14] used Composite International Diagnostic Interview (CIDI), a  
134 structured diagnostic interview to measure the presence of a major depressive disorder (MDD) according to DSM-  
135 IV criteria. The social support measures in these studies varied considerably, with five studies [10,12,15-17] using  
136 the original or the adapted version of the Multidimensional Scale of Perceived Social Support (MSPSS). Two  
137 studies [8,18] employed Demand-Control-Support-Questionnaire (DCSQ) to assess workplace social support, and  
138 three studies [9,19, 20] used Social Provision Scale (SPS). A scale in the Deployment Risk and Resilience Inventory  
139 (DRRI) was employed in one veteran study to assess the extent to which they perceive assistance and  
140 encouragement in the war zone from fellow unit members [11]. Four studies [21-24] used questionnaires that were  
141 developed by the authors. The Interview Schedule for Social Interaction—availability of Attachment Scale was used  
142 to measure the perceived availability of interpersonal support [25]. Whitley et al [26] used the Family Support Scale  
143 (FSS), and Haverfield et al. [27] used a subscale of the Basic Need Satisfaction Scale to assess general social  
144 support (Table 1a).

145 *Effects on Depression/Anxiety*

146 Social support has been shown benefit in abating symptoms of depression over time in 16/19 or 84% of the studies  
147 (Table 1a). Analyses of mental health conditions in a sample of nationally dispersed war-zone veterans for over  
148 seven years indicated that higher levels of social support post-deployment were associated with decreased risk of  
149 depression and anxiety disorders, as well as less severe symptoms [11]. Moreover, reduced levels of perceived  
150 support at the workplace were associated with increased levels of depression symptoms [18], which aligns with  
151 previous research that showed a direct influence of social support on the well-being of medical staff workers in the  
152 subsequent study waves [8]. A five-year study of rural community residents also found that low perceived

153 interpersonal support was associated with adverse mental health outcomes, including depression [25]. Billedo et al.  
154 [19] found short-term reciprocal associations between social support and depressive symptoms in sojourning  
155 students. They further stated that face-to-face interaction with the host-country network had immediate positive  
156 effects on perceived social support, which subsequently predicted lower depressive symptoms [19]. Even in samples  
157 of emerging adults, higher levels of perceived social support were protective against depressive and anxiety  
158 symptoms [20,21]. Boyden and colleagues followed a sample of parents of critically ill children over two years and  
159 found that greater perceived social support was associated with lower anxiety levels across assessments [9]. Higher  
160 baseline social support remained negatively associated with lower parental anxiety scores at 12 months ( $B=-0.12$ ,  
161  $p=0.03$ ; 95% CI =-.23 to -.01) and 24 months ( $B=-0.11$ ,  $p=0.04$ ; 95% CI=-0.21 to -0.01). This inverse association  
162 had dissipated by 24 months in their adjusted modeling [9]. Their findings concur with other aforementioned studies  
163 that demonstrated a benefit of having supportive relationships.

164 Interestingly, in terms of the source of social support, the role of family support remains unclear. One study of  
165 married Arab immigrant women in the U.S. did not find family support to be protective against depression. Instead,  
166 support from friends was found predictive of fewer depressive symptoms at follow-up [15]. However, the results of  
167 this study contrast with those of Zhou et al., [17] who showed that more perceived family support decreased usage  
168 of social networking sites, which was followed by decreased depressive symptoms among Chinese college students.  
169 Similarly, Haverfield et al. [27], analyzed data from patients with co-occurring disorders at treatment intake and  
170 across follow-ups in the United States and found that deficits in family support were the most consistent predictor of  
171 greater depression and substance use severity [27]. Consistent with previous studies on social support drawn from  
172 family and their positive impacts, two studies [16,26] specifically focused on custodial grandparents in the U.S.  
173 showed that while elevated caregiving stress may negatively affect grandparent caregivers' mental and overall  
174 health over time, greater social support from family networks may reduce depression accompanying caregiving.  
175 According to Whitley et al., [26] social support has a mediating effect on the relationship between depression and  
176 mental health quality of life in older (55+) African American custodial grandmothers, but not in their younger ( $\leq 55$ )  
177 counterparts.

178 Although depression peaks in young adulthood, it either can persist or emerge later in life, as evidenced by the three  
179 studies focusing exclusively on the role of social support in samples of adults aged 55 and older. Misawa and Kondo

180 (2019), in a study of 3464 Japanese older people, reported that social support was unrelated to changes in depressive  
181 symptoms but added that social factors of having hobbies and meeting frequently with friends were associated with  
182 improved late-life depression. This link between social interaction and social support was only observed to be  
183 protective for men [23]. Conversely, another study spanning eight years of follow-up of older adults in England  
184 found a bidirectional association between depressive symptoms and spousal support [24]. The authors found an  
185 average decrease in positive support (or an increase in negative support) over time in age- and gender-adjusted  
186 models, which later predicted increasing depressive symptom trajectory [24] Another study on older people with  
187 depression revealed that a chronic course of depression might decrease received social support over time [22].  
188 Moreover, their findings suggest that pre-existing depression in concert with less social support may predispose  
189 older persons, especially men and single people, to more depression over time [22].

190 A few studies (3/19 = 16%) found minimal or no evidence that lower levels of social support predict depression at  
191 follow-up. For example, in a naturalistic cohort study of Nabeboom et al. [13] people with a prior history of  
192 depression reported a smaller network size and less emotional support at baseline However, these structural  
193 (network size or having a partner) and the perceived aspects of social support had no predictive value in the  
194 longitudinal data. Similarly, only negative experiences with social support proved to be a risk factor for non-  
195 remission, independent of other social-relational variables in depressed persons [14]. Steine et al. [10]  
196 found statistically significant weak reciprocal associations between perceived social support and depression and  
197 anxiety symptoms over time among adult survivors of childhood sexual abuse. Although, Porter and Chambless  
198 reported a link between higher odds of relationship dissolution and social anxiety, they observed no differences  
199 between participants with high versus low social anxiety with regard to the amount of social support provided by  
200 their partners [12].

### 201 *Social support for women during and post pregnancy*

202 Table 1b presents results from twenty-eight articles examining associations between social support and depression  
203 during pregnancy or postpartum, uniquely vulnerable periods for women during which they may experience a range  
204 of psychosocial stressors. Two pairs of papers provided findings based on identical samples and were reported in a  
205 combined table entry, resulting in twenty-six studies. Studies were predominantly conducted in Asia (42%) and  
206 North America (31%), with the remaining studies from Europe (15%), South America (4%), Africa (4%), and



207 Australia (4%). In terms of individual countries, four studies were conducted in the United States, followed by  
208 Canada, China, Japan, and Turkey, all with three studies each. Sample sizes varied from 54 participants in a follow-  
209 up of a previous randomized trial [28] to 12,386 couples in a study with findings on both maternal and paternal  
210 depression [29]. Most of the included studies [28,30-43] began in the mid or late pregnancy, three [44-46] started in  
211 early pregnancy, and eight studies [29,47-53] started after birth. Women were on average aged between 18 and 40  
212 years old. The most commonly used measures of social support and depression were, respectively, the Medical  
213 Outcomes Study Social Support Survey (MOS-SSS) and the Edinburgh Postnatal Depression Scale (EPDS) (Table  
214 1b).

215 The majority of the studies (21/26 = 80%) found low social support increased postpartum depressive symptoms.  
216 Women with higher perceived social support exhibited lower depression ( $b = -0.308$ ,  $SE = 0.036$ ,  $p < .001$ ) and  
217 anxiety ( $b = -0.225$ ,  $SE = 0.039$ ,  $p < .001$ ) symptom severity across the peripartum period [31]. Similar results were  
218 obtained by other studies [28,38,43,44,48] conducted to investigate the trajectory of the association between  
219 depression and perceived social support. A study in Taiwan comprising 407 immigrant and native-born women  
220 showed that a presence of depression symptoms during pregnancy ( $\beta = 0.246$ ;  $p < 0.001$ ) and deficient social support  
221 ( $\beta = -0.233$ ;  $p < 0.001$ ) positively covaried with depressive symptoms at 3- months postpartum [34]. The significant  
222 protective factor of social support against postpartum depression was also highlighted in another study through a  
223 mediating effect of good clinical delivery.<sup>46</sup> Moreover, insufficient social support and frequent quarrels during  
224 pregnancy were associated with significant increase in joint postpartum depressive symptoms in mothers and fathers  
225 [29]. Tani et al. demonstrated a protective role of maternal and paternal relationships on postpartum depression in  
226 nulliparous women [42].

227 Asselmann and colleagues [32] found a bidirectional relationship between peripartum social support and  
228 psychopathology. They concluded that low social support increased the risk for anxiety and depressive disorders,  
229 and these disorders before pregnancy, in turn, fostered dysfunctional relationships and lowered social support across  
230 the peripartum period [32]. Women with comorbid anxiety and depression were at higher risk for lacking social  
231 support during this timeframe [32]. Social support appeared to be a predictor of depression from mid-pregnancy to  
232 six months postpartum, particularly in late pregnancy. Nonetheless, the predictive effect of social support on anxiety  
233 was only observed in late pregnancy [43]. Latina women who had lower social support during the third trimester of

234 pregnancy were reported to be at greater risk of depressive symptoms at six months in the postpartum, which was  
235 consistent with a study on primiparous mothers [49]. Specifically, we found that women with lower social support  
236 and higher self-reported adherence to the Traditional Female Role were at the highest risk of experiencing  
237 postpartum depressive symptoms [30].

238 Data from Canada reported inverse associations between 1) social support during pregnancy and anxiety and  
239 depression postnatally (RR 1.50, 95% CI 1.24 to 1.82) and 2) social support at four months postpartum and one year  
240 postpartum (RR 1.65, 95% CI 1.31 to 2.09) [48]. In contrast to these studies, Schwab-Reese et al. stated that social  
241 support was not protective against depressive or anxiety symptoms at six months postpartum as it was at three  
242 months postpartum [50].

243 Satisfaction with all the types of support (emotional, material, esteem, and informative) from the spouse reduced the  
244 psychological disorders in mothers as much in the prenatal compared to the postpartum period [40]. Among  
245 immigrant mothers in Taiwan from China or Vietnam, emotional support was found to be significantly and inversely  
246 associated with postpartum depression [34]. Emotional and informational support were identified as the most  
247 important types of social support for postpartum anxiety [48]. Marginal structural models were employed to evaluate  
248 the time-varying associations of low social support (before and in early pregnancy) with depression in late  
249 pregnancy in a cohort of Peruvian women, and analyses suggested that women with sustained low scores on the 6-  
250 item Sarason Social Support Questionnaire (SSQ-6) were at higher risk of antepartum depression [43]. The authors  
251 also found a stronger association of fewer persons providing social support on depression risk than low social  
252 support satisfaction.

253 Others have found that not all forms of social support during a woman's transition into motherhood are equally  
254 beneficial in alleviating depression and anxiety symptoms. Razurel et al. reported that support provided by one's  
255 partner buffered the effects of stress on depression, although support from friends or professionals did not [39].  
256 Although social support from family and friends was deemed less prominent than that from the spouse, studies  
257 [35,40] showed that these sources of support also had an influence on maternal mental health. A study evaluating the  
258 impact of family relationships and support on perinatal depressive symptoms between the third trimester of  
259 pregnancy and two to six months postpartum noted that the incidence and persistence of depression symptoms were  
260 predicted by lower baseline perceived emotional support from the mother-in-law and the husband, respectively [33].

261 In a large population-based study, increases in partner and family support had a more protective effect against  
262 anxiety and stress, and higher than average levels of anxiety and stress led to maternal-reported decreases in support  
263 [54].

264 Some studies [37,52] did not find associations between low perceived social support during pregnancy and  
265 postpartum depression. Ohara et al. [46] showed that satisfaction with social support did not directly predict  
266 depression in the postpartum period at a statistically significant level. Further, their path model revealed that less  
267 satisfaction with the social support received during pregnancy was rather a cause of postpartum depression. This  
268 indirect link of social support with depression in the postpartum period is in line with another study with slightly  
269 larger sample size, one year later, by the same first author [45]. While one study [55] found that the number of  
270 supportive persons during pregnancy had a more substantial effect on decreasing postpartum depressive symptoms  
271 in depressed relative to non-depressed mothers, their analyses also showed that satisfaction with social support was  
272 not a significant predictor of postpartum depression. The inconsistent findings on social support and depression and  
273 anxiety across included studies can be partially attributed to varying operational definitions of social support,  
274 utilization of different self-report social support and depression measures, and insufficient control for confounding  
275 variables.

## 276 **Social isolation/Loneliness**

277 Given that both these concepts were concurrently assessed in addressing mental health outcomes in some studies,  
278 articles that met the inclusion criteria of the current review and examined the subjective counterpart of social  
279 isolation were included in Table 2. This table presents characteristics of selected studies that explored the impact of  
280 social isolation on depression and anxiety disorders. The four studies [56-59] reported on a total of 7,820 older  
281 adults aged 50 and above in European countries, namely Ireland, Wales, Germany, and the Netherlands. The number  
282 of participants in the studies varied considerably, from 285 participants with a primary diagnosis of depression in a  
283 two-year follow-up study to 5,066 in a report on a well-characterized cohort of adults from Ireland [56]. Social  
284 isolation and loneliness (perceived social isolation) are intricately related, albeit conceptually distinct.

285 Domènech-Abella and colleagues (2019) found social isolation and loneliness to be antecedent risk factors for  
286 incident depression or exacerbating late-life generalized anxiety or major depressive disorder independently [56].  
287 The authors cautioned readers not to underestimate the subjective aspects of social isolation. Their findings are

288 concordant with a previous study by Holvast et al. [59] which showed that loneliness was independently associated  
289 with more severe depressive symptoms at follow-up ( $\beta = 0.61$ ; 95% CI 0.12–1.11). Moreover, participants who  
290 scored high on the subjective appraisal of social isolation, measured by six-item de Jong Gierveld Loneliness Scale  
291 with subscales for emotional loneliness (perceived absence of intimate relationships) and social loneliness  
292 (perceived lack of a wider circle of friends and acquaintances), at baseline had a lower likelihood of achieving  
293 remission two years later [59]. The Composite International Diagnostic Interview (CIDI) was employed in both  
294 studies to measure depressive disorders at baseline [56,59], and Inventory of Depressive Symptoms (IDS) was used  
295 to assess the depression course at the follow-up in one study [59].

296 Two studies [57,58] utilized the Lubben Social Network Scale, a validated instrument designed to gauge social  
297 isolation in the elderly. Analysis of Cognitive Function and Ageing Study-Wales (CFAS-Wales) by Evans et al.  
298 (2019) showed that people with depression or anxiety experience poorer social relationships and higher social  
299 isolation and loneliness relative to those without such symptomatology, despite reporting an equivalent level of  
300 social contact [57]. The apparent reductions in negative affect at follow-up in over half of the respondents with  
301 clinically relevant depression or anxiety, diagnosed using the Automated Geriatric Examination for Computer-  
302 Assisted Taxonomy (AGECAT) algorithm, at baseline could be due to biopsychosocial changes intrinsic to ageing  
303 and/or cohort effects. Results by Herbolsheimer et al. (2018) opposed previous findings, stating that social isolation  
304 from friends and neighbors at the baseline was not directly associated with depressive symptoms at the 3-year  
305 follow-up [58]. Of importance, the authors also showed that being socially isolated from friends and neighbors was  
306 related to lower levels of out-of-home physical activity, which predicted more depressive symptoms after three years  
307 ( $\beta = .014$ , 95% CI .002 to .039) [58]. These reported findings demonstrate the potentially detrimental effect of  
308 objective and subjective social isolation on mood disorders in later life. Extant evidence suggests the importance of  
309 considering both social isolation and loneliness without the exclusion of the other in efforts to mitigate risk.

### 310 **Social networks**

311 Five studies, i.e., seven papers, were identified that examined the longitudinal relationship between social networks  
312 and depression or anxiety (see Table 3). Four [56,60-63] of the five studies [13,14,56,60-63] on social networks  
313 focused on older adults. Community-dwelling individuals aged 75 and older with restricted social networks were  
314 more likely to develop depression compared to those who maintained an integrated social network [61]. While it has

315 also been noted that respondents who experienced social loss within the last six months reported a higher risk of  
316 depression in old age, the adverse effects of loss on depression could be attenuated by the existence of an integrated  
317 social network [61]. In a large follow-up study spanning ten years that recruited older female nurses, lower social  
318 networks increased the risk of incident late-life depression in age-adjusted models [60]. In line with these results,  
319 another study on the elderly showed that a smaller network size measured using the Berkman-Syme Social Network  
320 Index is a robust risk factor of major depression and generalized anxiety disorder [56]. Conversely, one study on  
321 American adults aged 57–85 years denies this relationship as no direct effects of social networks on frequencies of  
322 depression symptoms were detected at follow-up [63]. It is worth noting that the same study also showed that social  
323 networks predicted higher levels of perceived isolation ( $\beta=0.09$ ;  $p<0.0001$ ), which in turn predicted higher levels of  
324 depression and anxiety symptoms ( $\beta=0.12$ ;  $p<0.0001$ ) [63]. According to papers [13,14] that used data from  
325 NESDA and NESDO, the size of social networks at baseline did not predict depression at follow-up. For adults with  
326 a pre-existing diagnosis of major depressive disorder, only the social network characteristic of living in a larger  
327 household was reported to have a unique predictive value for depression course [14].

328 While smaller social networks emerged as a predictor of depression in three of the five studies, the remaining studies  
329 showed no predictive value of social networks in the depression course ( $2/5 = 40\%$ ). The extent to which measures  
330 assessed the concept of social networks across the included studies could be disputed and may account for between-  
331 study inconsistencies. Some assessed using a count of the number of people in the social network [13,14], one  
332 assessed social network type (restricted vs. integrated) [61], four assessed network size and frequency of interaction  
333 with network members [56,60,62,63], and one study assessed additional indicators such as three layers of human  
334 relationships (community-layer, interpersonal-layer, and partner-layer connection) [62]. These longitudinal studies  
335 found that social networks have both direct and buffering effects on psychological wellbeing.

## 336 **Discussion**

337 The goal of this scoping review was to determine current knowledge regarding the effect of social connection on  
338 depression and/or anxiety symptoms and diagnoses in the general population. Lund et al. (2018) noted that while  
339 there is no universal definition of social connection, it is considered an umbrella term that generally includes the  
340 following components: social support, social networks, social isolation and loneliness [64].

341 Much of the research investigating the role of social connections in the studies published in the last five years has  
342 focused primarily on social support as compared to the other components of social connection and, more  
343 specifically, on perceived emotional support. The majority of studies, regardless of whether the support was  
344 received or perceived, showed that, in general, social support was a protective factor for both depressive symptoms  
345 and disorders. The consistency of the findings across a variety of settings, measures of exposure, and populations  
346 supports the generalizability of the findings in this review. The measures used varied in the type of social support  
347 assessed, although most studies assessed subjective and objective emotional support rather than structural support.

348 Few of the studies examined the effect of social support on anxiety symptoms or diagnoses, and those that did  
349 investigate these associations found the results mixed and weak. A single study examined the effect of social support  
350 on social anxiety and found no association [12]. However, there were too few studies to draw any firm conclusions.

351 Over half of these studies investigated the effects of social support on depression/ anxiety at various stages of  
352 pregnancy. The preponderance of studies that investigated the effect of social support on pre/postpartum depression  
353 could be due to our restriction of included studies in this review to longitudinal studies since the effects of social  
354 support during pregnancy on postpartum depression can readily be assessed by employing longitudinal study design.

355 There were far fewer studies that examined the longitudinal relationship between social networks and anxiety or  
356 depression, the majority of which focused on older adults. Although measures which assessed the concept of social  
357 networks were somewhat inconsistent and may have led to mixed results between studies, on the whole, social  
358 networks have direct and buffering effects on depression /anxiety. More studies of the effects of social networks  
359 such as size and structure and the characteristics of network ties, frequency of contact, reciprocity, duration, and  
360 intimacy will give us a greater understanding by which these networks impact depression and anxiety, and  
361 opportunities for intervention.

362 A small number of studies met our inclusion criteria for exploring the impact of social isolation on depression and  
363 anxiety. Despite some methodological limitations of these studies, there was fairly strong evidence that both social  
364 isolation and loneliness (perceived social isolation) were potentially detrimental in terms of development of mood  
365 disorders in later life.

366 The extant literature recommends that the effects of the individual components rather than a composite measure of  
367 social connection be used because the correlation between these components is relatively low. Investigating the  
368 effects of individual components could lead to greater insight into possible causal pathways and appropriate  
369 interventions. Epidemiological research has generally focused on the structural (e.g., social network size /density,  
370 marital status, living arrangements) or functional aspects of social relationships (received and perceived social  
371 support, perceived social isolation), while some researchers have also studied multi-dimensional approaches, i.e., a  
372 combination of structural and functional aspects. On the rare occasions where researchers have attempted to  
373 combine the effects of the components of social connection on the diagnostic outcomes, two different approaches  
374 have been used: 1. They have either used multivariable regression models (linear or logistic – depending on the  
375 outcome) with each of the components included as a separate predictor [34]. They have treated “social connection”  
376 as an underlying latent variable, while treating the individual components as the observed or “manifest” variables  
377 [65].

378 Inferences from this review should be drawn cautiously, considering some limitations. Firstly, we only included  
379 studies published in the English language. Other papers may be available in different languages. Secondly, we  
380 conducted a scoping review and not a systematic review; thus, the included papers were not assessed based on their  
381 quality. Some of the included studies in this review have small sample size. These studies must be replicated in  
382 larger, heterogeneous populations with a longer interval between the baseline assessment of social connectedness  
383 measures and follow-up of depressive and anxiety symptoms to ensure reliable and valid results for inferring the  
384 direction of causality. Despite these limitations, the longitudinal/prospective research reviewed here provides current  
385 knowledge on the effects of social connection on depression and anxiety and sheds important insights into possible  
386 causal mechanisms and a deeper understanding of how prior social circumstances can affect later mental health  
387 outcomes.

## 388 **Clinical and Policy Implications**

389 The results of this scoping review have implications for clinical practice. Strong associations between lacking social  
390 connections and risk of depression underscore the importance of improving clinical detection of high-risk patients,  
391 including those with low received or perceived social support and elevated perceived loneliness. Because these  
392 characteristics may be difficult for primary care physicians to detect in their patients [66], consideration might be

393 given to implementing brief screening instruments analogous to clinical tools that have been recommended to assess  
394 network size [67]. The link between social connections and improved adherence to medical recommendations [68]  
395 may motivate practitioners to detect and seek to address social isolation in their patients. However, meaningful  
396 clinical progress in addressing a lack of social connections may depend upon readily accessible and effective  
397 interventions.

398 The results also have implications for social policy. Because the prevalence of loneliness increases [69] and the size  
399 of social networks declines [70] as older adults age, the present findings bolster the public health rationale for  
400 addressing social vulnerabilities among older adults. Although some aspects of loneliness and social isolation likely  
401 involve genetic susceptibility [71], other aspects appear to involve characteristics of the neighborhood environment  
402 [72]. Policymakers seeking to reduce the adverse mental health effects of social isolation among older adults, for  
403 example, might weigh the benefits of designing supportive housing structures and neighborhoods for older adults  
404 that provide greater opportunities for socialization and formation of social connections.

## 405 **Figure Legend**

406 Fig. 1. PRISMA flow chart of the scoping review

407

408

409

410

411

412

413

414

415

416



## 417 **References**

- 418 1. Becofsky KM, Shook RP, Sui X, Wilcox S, Lavie CJ, Blair SN. Influence of the source of social support and  
419 size of social network on all-cause mortality. *Mayo Clin Proc.* 2015;90(7):895-902.
- 420 2. Lamblin M, Murawski C, Whittle S, Fornito A. Social connectedness, mental health and the adolescent brain.  
421 *Neurosci Biobehav Rev.* 2017;80:57-68.
- 422 3. Ashida S, Heaney CA. Differential associations of social support and social connectedness with structural  
423 features of social networks and the health status of older adults. *Journal of Aging and Health.*  
424 2008;20(7):872-93.
- 425 4. Holt-Lunstad J, Robles TF, Sbarra DA. Advancing social connection as a public health priority in the United  
426 States. *Am Psychol.* 2017;72(6):517-530.
- 427 5. Choi KW, Stein MB, Nishimi KM, Ge T, Coleman JRI, Chen CY, et al. An exposure-wide and mendelian  
428 randomization approach to identifying modifiable factors for the prevention of depression. *Am J Psychiatry.*  
429 2020;177(10):944-954.
- 430 6. Silva M, Loureiro A, Cardoso G. Social determinants of mental health: A review of the evidence. *The*  
431 *European Journal of Psychiatry.* 2016;(4):259-92.
- 432 7. Ojagbemi A, Bello T, Gureje O. The roles of depression and social relationships in the onset and course of  
433 loneliness amongst Nigerian elders. *Int J Geriatr Psychiatry.* 2021;36(4):547-557.
- 434 8. Berthelsen M, Pallesen S, Magerøy N, Tyssen R, Bjorvatn B, Moen BE, et al. Effects of psychological and  
435 social factors in shiftwork on symptoms of anxiety and depression in nurses: A 1-year follow-up. *Journal of*  
436 *Occupational and Environmental Medicine.* 2015;57(10):1127-37.
- 437 9. Boyden JY, Hill DL, Carroll KW, Morrison WE, Miller VA, Feudtner C. The association of perceived social  
438 support with anxiety over time in parents of children with serious illnesses. *Journal of Palliative Medicine.*  
439 2020;23(4):527-34.
- 440 10. Steine IM, Winje D, Krystal JH, Milde AM, Bjorvatn B, Nordhus IH, et al. Longitudinal relationships  
441 between perceived social support and symptom outcomes: Findings from a sample of adult survivors of  
442 childhood sexual abuse. *Child Abuse & Neglect.* 2020;107:104566.

- 443 11. Ciarleglio MM, Aslan M, Proctor SP, Concato J, Ko J, Kaiser AP, et al. Associations of stress exposures and  
444 social support with long-term mental health outcomes among US Iraq War Veterans. *Behavior Therapy*.  
445 2018;49(5):653-67.
- 446 12. Porter E, Chambless DL. Social anxiety and social support in romantic relationships. *Behavior Therapy*.  
447 2017;48(3):335-48.
- 448 13. Noteboom A, Beekman AT, Vogelzangs N, Penninx BW. Personality and social support as predictors of first  
449 and recurrent episodes of depression. *Journal of Affective Disorders*. 2016;190:156-61.
- 450 14. Van Den Brink RH, Schutter N, Hanssen DJ, Elzinga BM, Rabeling-Keus IM, Stek ML, et al. Prognostic  
451 significance of social network, social support and loneliness for course of major depressive disorder in  
452 adulthood and old age. *Epidemiology and Psychiatric Sciences*. 2018;27(3):266-277.
- 453 15. Aroian K, Uddin N, Blbas H. Longitudinal study of stress, social support, and depression in married Arab  
454 immigrant women. *Health Care for Women International*. 2017;38(2):100-17.
- 455 16. Hayslip Jr B, Blumenthal H, Garner A. Social support and grandparent caregiver health: One-year  
456 longitudinal findings for grandparents raising their grandchildren. *Journals of Gerontology Series B:  
457 Psychological Sciences and Social Sciences*. 2015;70(5):804-12.
- 458 17. Zhou M, Li F, Wang Y, Chen S, Wang K. Compensatory social networking site use, family support, and  
459 depression among college freshman: Three-wave panel study. *J Med Internet Res*. 2020;22(9):e18458.
- 460 18. Åhlin JK, Rajaleid K, Jansson-Fröjmark M, Westerlund H, Hanson LL. Job demands, control and social  
461 support as predictors of trajectories of depressive symptoms. *Journal of Affective Disorders*. 2018;235:535-  
462 43.
- 463 19. Billedo CJ, Kerkhof P, Finkenauer C, Ganzeboom H. Facebook and face-to-face: Examining the short-and  
464 long-term reciprocal effects of interactions, perceived social support, and depression among international  
465 students. *Journal of Computer-Mediated Communication*. 2019;24(2):73-89.
- 466 20. Scardera S, Perret LC, Ouellet-Morin I, Gariépy G, Juster RP, Boivin M, et al. Association of social support  
467 during adolescence with depression, anxiety, and suicidal ideation in young adults. *JAMA Network Open*.  
468 2020;3(12):e2027491.

- 469 21. Crowe L, Butterworth P. The role of financial hardship, mastery and social support in the association between  
470 employment status and depression: Results from an Australian longitudinal cohort study. *BMJ Open*.  
471 2016;6(5):e009834.
- 472 22. Houtjes W, Deeg D, van de Ven PM, van Meijel B, van Tilburg T, Beekman A. Is the naturalistic course of  
473 depression in older people related to received support over time? Results from a longitudinal population-  
474 based study. *International Journal of Geriatric Psychiatry*. 2017;32(6):657-63.
- 475 23. Misawa J, Kondo K. Social factors relating to depression among older people in Japan: analysis of  
476 longitudinal panel data from the AGES project. *Aging & Mental Health*. 2019;23(10):1423-32.
- 477 24. Stafford M, Antonucci TC, Zaninotto P. Joint trajectories of spousal social support and depressive symptoms  
478 in older age. *Journal of Aging and Health*. 2019;31(5):760-82.
- 479 25. Handley TE, Rich J, Lewin TJ, Kelly BJ. The predictors of depression in a longitudinal cohort of community  
480 dwelling rural adults in Australia. *Social Psychiatry and Psychiatric Epidemiology*. 2019;54(2):171-80.
- 481 26. Whitley DM, Kelley SJ, Lamis DA. Depression, social support, and mental health: A longitudinal mediation  
482 analysis in African American custodial grandmothers. *The International Journal of Aging and Human*  
483 *Development*. 2016;82(2-3):166-87.
- 484 27. Haverfield MC, Ilgen M, Schmidt E, Shelley A, Timko C. Social support networks and symptom severity  
485 among patients with co-occurring mental health and substance use disorders. *Community Mental Health*  
486 *Journal*. 2019;55(5):768-76.
- 487 28. Milgrom J, Hirshler Y, Reece J, Holt C, Gemmill AW. Social support—a protective factor for depressed  
488 perinatal women? *International Journal of Environmental Research and Public Health*. 2019;16(8):1426.
- 489 29. Nakamura A, Sutter-Dallay AL, El-Khoury Lesueur F, Thierry X, Gressier F, Melchior M, et al. Informal and  
490 formal social support during pregnancy and joint maternal and paternal postnatal depression: Data from the  
491 French representative ELFE cohort study. *International Journal of Social Psychiatry*. 2020;66(5):431-41.
- 492 30. Albuja AF, Lara MA, Navarrete L, Nieto L. Social support and postpartum depression revisited: the  
493 traditional female role as moderator among Mexican women. *Sex Roles*. 2017;77(3-4):209-20.
- 494 31. Asselmann E, Kunas SL, Wittchen HU, Martini J. Maternal personality, social support, and changes in  
495 depressive, anxiety, and stress symptoms during pregnancy and after delivery: A prospective-longitudinal  
496 study. *Plos One*. 2020;15(8):e0237609.

- 497 32. Asselmann E, Wittchen HU, Erler L, Martini J. Peripartum changes in social support among women with and  
498 without anxiety and depressive disorders prior to pregnancy: A prospective-longitudinal study. *Archives of*  
499 *Women's Mental Health*. 2016;19(6):943-52.
- 500 33. Cankorur VS, Abas M, Berksun O, Stewart R. Social support and the incidence and persistence of depression  
501 between antenatal and postnatal examinations in Turkey: A cohort study. *BMJ Open*. 2015;5(4):e006456.
- 502 34. Chen HH, Chien LY. A comparative study of domestic decision-making power and social support as  
503 predictors of postpartum depressive and physical symptoms between immigrant and native-born women. *PLoS*  
504 *One*. 2020;15(4):e0231340.
- 505 35. Faleschini S, Millar L, Rifas-Shiman SL, Skouteris H, Hivert MF, Oken E. Women's perceived social  
506 support: associations with postpartum weight retention, health behaviors and depressive symptoms. *BMC*  
507 *Women's Health*. 2019;19(1):1-8.
- 508 36. Hare MM, Kroll-Desrosiers A, Deligiannidis KM. Peripartum depression: Does risk versus diagnostic status  
509 impact mother–infant bonding and perceived social support? *Depression and Anxiety*. 2020;38(4):390-99.
- 510 37. Li Y, Long Z, Cao D, Cao F. Social support and depression across the perinatal period: a longitudinal study.  
511 *Journal of Clinical Nursing*. 2017;26(17-18):2776-83.
- 512 38. Racine N, Zumwalt K, McDonald S, Tough S, Madigan S. Perinatal depression: The role of maternal adverse  
513 childhood experiences and social support. *Journal of Affective Disorders*. 2020;263:576-81.
- 514 39. Razurel C, Kaiser B, Antonietti JP, Epiney M, Sellenet C. Relationship between perceived perinatal stress  
515 and depressive symptoms, anxiety, and parental self-efficacy in primiparous mothers and the role of social  
516 support. *Women & Health*. 2017;57(2):154-72.
- 517 40. Razurel C, Kaiser B. The role of satisfaction with social support on the psychological health of primiparous  
518 mothers in the perinatal period. *Women & Health*. 2015;55(2):167-86.
- 519 41. Senturk V, Abas M, Dewey M, Berksun O, Stewart R. Antenatal depressive symptoms as a predictor of  
520 deterioration in perceived social support across the perinatal period: A four-wave cohort study in Turkey.  
521 *Psychological Medicine*. 2017;47(4):766-75.
- 522 42. Tani F, Castagna V. Maternal social support, quality of birth experience, and post-partum depression in  
523 primiparous women. *The Journal of Maternal-Fetal & Neonatal Medicine*. 2017;30(6):689-92.

- 524 43. Zhong QY, Gelaye B, VanderWeele TJ, Sanchez SE, Williams MA. Causal model of the association of social  
525 support with antepartum depression: A marginal structural modeling approach. *Am J Epidemiol.*  
526 2018;187(9):1871-1879.
- 527 44. Gan Y, Xiong R, Song J, Xiong X, Yu F, Gao W, et al. The effect of perceived social support during early  
528 pregnancy on depressive symptoms at 6 weeks postpartum: A prospective study. *BMC Psychiatry.*  
529 2019;19(1):1-8.
- 530 45. Ohara M, Nakatochi M, Okada T, Aleksic B, Nakamura Y, Shiino T, et al. Impact of perceived rearing and  
531 social support on bonding failure and depression among mothers: A longitudinal study of pregnant women.  
532 *Journal of Psychiatric Research.* 2018;105:71-7.
- 533 46. Ohara M, Okada T, Aleksic B, Morikawa M, Kubota C, Nakamura Y, et al. Social support helps protect  
534 against perinatal bonding failure and depression among mothers: A prospective cohort study. *Scientific*  
535 *Reports.* 2017;7(1):1-8.
- 536 47. Chen HH, Hwang FM, Lin LJ, Han KC, Lin CL, Chien LY. Depression and social support trajectories during  
537 1 year postpartum among marriage-based immigrant mothers in Taiwan. *Archives Of Psychiatric Nursing.*  
538 2016;30(3):350-5.
- 539 48. Hetherington E, McDonald S, Williamson T, Tough S. Trajectories of social support in pregnancy and early  
540 postpartum: Findings from the All Our Families cohort. *Social Psychiatry and Psychiatric Epidemiology.*  
541 2020;55(2):259-67.
- 542 49. Leonard KS, Evans MB, Kjerulff KH, Downs DS. Postpartum perceived stress explains the association  
543 between perceived social support and depressive symptoms. *Women's Health Issues.* 2020;30(4):231-9.
- 544 50. Schwab-Reese LM, Schafer EJ, Ashida S. Associations of social support and stress with postpartum maternal  
545 mental health symptoms: Main effects, moderation, and mediation. *Women & Health.* 2017;57(6):723-40.
- 546 51. Tsai AC, Tomlinson M, Comulada WS, Rotheram-Borus MJ. Food insufficiency, depression, and the  
547 modifying role of social support: Evidence from a population-based, prospective cohort of pregnant women  
548 in peri-urban South Africa. *Social Science & Medicine.* 2016;151:69-77.
- 549 52. Yörük S, Açıkgöz A, Türkmen H, Karlıdere T. The prevalence of postpartum depression and the correlation  
550 of perceived social support and quality of life with postpartum depression: A longitudinal study. *P R Health*  
551 *Sci J.* 2020;39(4):327-335.

- 552 53. Zheng X, Morrell J, Watts K. Changes in maternal self-efficacy, postnatal depression symptoms and social  
553 support among Chinese primiparous women during the initial postpartum period: A longitudinal study.  
554 *Midwifery*. 2018;62:151-60.
- 555 54. Racine N, Plamondon A, Hentges R, Tough S, Madigan S. Dynamic and bidirectional associations between  
556 maternal stress, anxiety, and social support: The critical role of partner and family support. *Journal of*  
557 *Affective Disorders*. 2019;252:19-24
- 558 55. Morikawa M, Okada T, Ando M, Aleksic B, Kunimoto S, Nakamura Y, et al. Relationship between social  
559 support during pregnancy and postpartum depressive state: A prospective cohort study. *Scientific Reports*.  
560 2015;5(1):1-9.
- 561 56. Domènech-Abella J, Mundó J, Haro JM, Rubio-Valera M. Anxiety, depression, loneliness and social network  
562 in the elderly: Longitudinal associations from The Irish Longitudinal Study on Ageing (TILDA). *Journal of*  
563 *Affective Disorders*. 2019;246:82-8.
- 564 57. Evans IE, Llewellyn DJ, Matthews FE, Woods RT, Brayne C, Clare L. Social isolation, cognitive reserve,  
565 and cognition in older people with depression and anxiety. *Aging & Mental Health*. 2019;23(12):1691-700.
- 566 58. Herbolsheimer F, Ungar N, Peter R. Why is social isolation among older adults associated with depressive  
567 symptoms? The mediating role of out-of-home physical activity. *International Journal of Behavioral*  
568 *Medicine*. 2018;25(6):649-57.
- 569 59. Holvast F, Burger H, de Waal MM, van Marwijk HW, Comijs HC, Verhaak PF. Loneliness is associated with  
570 poor prognosis in late-life depression: Longitudinal analysis of the Netherlands study of depression in older  
571 persons. *Journal of Affective Disorders*. 2015;185:1-7.
- 572 60. Chang SC, Pan A, Kawachi I, Okereke OI. Risk factors for late-life depression: A prospective cohort study  
573 among older women. *Preventive Medicine*. 2016;91:144-51.
- 574 61. Förster F, Stein J, Löbner M, Pabst A, Angermeyer MC, König HH, et al. Loss experiences in old age and  
575 their impact on the social network and depression—results of the Leipzig Longitudinal Study of the Aged  
576 (LEILA 75+). *Journal of Affective Disorders*. 2018;241:94-102.
- 577 62. Reynolds RM, Meng J, Dorrance Hall E. Multilayered social dynamics and depression among older adults: A  
578 10-year cross-lagged analysis. *Psychology and Aging*. 2020;35(7):948-962.

- 579 63. Santini ZI, Jose PE, Cornwell EY, Koyanagi A, Nielsen L, Hinrichsen C, et al. Social disconnectedness,  
580 perceived isolation, and symptoms of depression and anxiety among older Americans (NSHAP): A  
581 longitudinal mediation analysis. *The Lancet Public Health*. 2020;5(1):e62-70.
- 582 64. Lund C, Brooke-Sumner C, Baingana F, Baron EC, Breuer E, Chandra P, et al. Social determinants of mental  
583 disorders and the sustainable development goals: A systematic review of reviews. *Lancet Psychiatry*.  
584 2018;5(4):357-369.
- 585 65. Saeri AK, Cruwys T, Barlow FK, Stronge S, Sibley CG. Social connectedness improves public mental health:  
586 Investigating bidirectional relationships in the New Zealand attitudes and values survey. *Australian & New  
587 Zealand Journal of Psychiatry*. 2018;52(4):365-74.
- 588 66. Due TD, Sandholdt H, Siersma D, Waldroff FB. How well do general practitioners know their elderly  
589 patients' social relations and feelings of loneliness? *BMC Family Pract*. 2018;19:34.
- 590 67. Pantell M, Rehkopf D, Jutte D, Syme SL, Balmes J, Adler N. Social isolation: a predictor of mortality  
591 comparable to traditional clinical risk factors. *Am J Public Health*. 2013;103(11):2056-62. DiMatteo MR.  
592 Social support and patient adherence to medical treatment: A meta-analysis. *Health Psychol*. 2004; 23(2):207-  
593 218.
- 594 68. Dykstra PA, van Tilburg TG, de Jong Gierveld J. Changes in older adult loneliness: Results from a seven-  
595 year longitudinal study. *Res Aging*. 2005; 27(6):725-747.
- 596 69. Wrzus C, Wagner J, Hänel M, Neyer FJ. Social network changes and life events across the life span: A meta-  
597 analysis. *Psychol Bull*. 2013; 139(1):53-80.
- 598 70. Goossens L, van Roekel E, Verhagen M, Cacioppo JT, Cacioppo S, Maes M, Boomsma DI. The genetics of  
599 loneliness: linking evolutionary theory to genome-wide genetics, epigenetics, and social science. *Perspect  
600 Psychol Sci*. 2015;10(2):213-26.
- 601 71. Tong S, Mullen RA, Hochheimer CJ, Sabo RT, Liaw WR, Nease DE Jr, Krist AH, Frey JJ 3rd. Geographic  
602 Characteristics of Loneliness in Primary Care. *Ann Fam Med*. 2019;17(2):158-160.

603

604

605

606

607

608 **Table 1a. Characteristics of included studies on social support for nonpregnant samples**

| Reference               | Sample/Setting [Country] Age (y)                                                                | Study Type                                                                   | Follow-up Times                                                                             | Social Support [Measure]                                                    | MH Outcome [Measure]                                                         | Main Findings for Social Support                                                                                                                                                                                                                                                 |
|-------------------------|-------------------------------------------------------------------------------------------------|------------------------------------------------------------------------------|---------------------------------------------------------------------------------------------|-----------------------------------------------------------------------------|------------------------------------------------------------------------------|----------------------------------------------------------------------------------------------------------------------------------------------------------------------------------------------------------------------------------------------------------------------------------|
| Åhlin et al., 2018      | n=6679 workers [Sweden] Age = 16-64                                                             | Data from Swedish Longitudinal Occupational Survey of Health (SLOSH)         | 6 waves 2006, 2008, 2010, 2012, 2014, 2016                                                  | Workplace social support [DCSQ]                                             | Depressive symptoms [SCL-CD6]                                                | Perceiving low social support is associated with subsequent higher or increasing levels of depressive symptoms over time.                                                                                                                                                        |
| Aroian et al., 2017     | n=388 married Arab immigrant women [USA] Mean Age: 42                                           | Longitudinal study                                                           | 3 waves roughly 18 months apart                                                             | Perceived social support [MSPSS]                                            | Depressive symptoms [CES-D]                                                  | An increased rate of change over time in friend support contributed to lower depression at Time 3, but changes over time in support from husband and support from family were not significant predictors of depression at Time 3.                                                |
| Berthelsen et al., 2015 | n=2059 nurses [Norway] Age: 21-39                                                               | One-year follow-up study                                                     | 2 timepoints T1: baseline T2: 1-year follow-up                                              | Social support [DCSQ]                                                       | Anxiety and depression symptoms [HADS]                                       | Structural equation modeling revealed statistically significant reverse regression paths between baseline symptoms of anxiety and depression and follow-up role clarity, role conflict, fair leadership, and social support.                                                     |
| Billedo et al., 2019    | n=98 international students from 76 host countries Age: 16-49                                   | Longitudinal study                                                           | 3 waves with 3-month intervals between each wave                                            | Perceived social support [SPS]                                              | Depressive symptoms [CES-D-11]                                               | Face to face interaction with the host-country network had immediate positive impacts on international students perceived social support, which in turn, predicted lower depressive symptoms                                                                                     |
| Boyden et al., 2020     | n=200 parents of 158 seriously ill children [USA] Age: ≥18                                      | Prospective cohort study: Decision Making in Serious Pediatric Illness study | 3 timepoints T1: baseline T2: 12 months T3: 24 months                                       | Perceived social support [SPS]                                              | Prenatal anxiety [HADS]                                                      | Cross-sectionally, social support scores were negatively associated with anxiety scores at each time point. Longitudinally, social support scores were associated with anxiety scores, although this association weakened in adjusted modeling.                                  |
| Ciarleglio et al., 2018 | n=375 active-duty veterans deployed to Iraq at least once between 2003 and 2005 [USA] Age: ≥ 21 | Longitudinal study: VA Cooperative Studies Program Study #566 (CSP#566)      | 3 timepoints T1: prior to deployment T2: during deployment T3: after return from deployment | Post-war-zone social support [DRRI]                                         | Depression and anxiety severity [DASS-21 Generalized anxiety disorder [MINI] | Higher scores on the post-deployment social support scale were associated with lower risk of all outcomes except problem drinking. Post-deployment social support remained a strong protective factor for PTSD, depression, and anxiety symptom severity at long-term follow-up. |
| Crowe et al., 2016      | n=6521 participants in early twenties [Australia] Age: 20-24                                    | Longitudinal study: Personality and Total Health (PATH) Through Life Project | 3 waves with 4-year intervals between each wave over 8-year period                          | Level of positive social support [2 sets of 5-item questions]               | Depressive symptoms [Goldberg Depression Scale]                              | Social support, financial hardship, and a sense of personal control (mastery) all emerged as important mediators between unemployment and depression.                                                                                                                            |
| Handley et al., 2019    | n = 2639 rural residents [Australia] Age: 18–47                                                 | Data from Australian Rural Mental Health Study (ARMHS)                       | 4 timepoints T1: baseline T2: 1 year T3: 3 years T4: 5 years after baseline                 | Perceived interpersonal support [Interview Schedule for Social Interaction] | Depression [PHQ-9]                                                           | The baseline-only model found that the odds of depression were increased for those who were permanently unable to work, had low perceived availability of interpersonal support, had a greater number of recent adverse life events, and had higher levels of neuroticism.       |
| Haverfield et al., 2019 | n=406 patients with co-occurring mental health and SUDs [USA] Age: NR                           | Longitudinal study                                                           | 4 timepoints T1: baseline T2: 3-, T3: 9-, and T4: 15-month follow-ups                       | Social support [Subscale of Basic Need Satisfaction Scale]                  | Depression severity [PHQ-9]                                                  | Less family support (i.e., more conflict) was the most consistent predictor of mental health and substance use outcomes and was associated with greater psychiatric, depression, PTSD, and drug use severity.                                                                    |
| Hayslip et al., 2015    | n=86 grandparent caregivers [USA, Canada] Age: 38–90                                            | Longitudinal study                                                           | 2 timepoints over 1-year time frame                                                         | Perceived social support [MSPSS]                                            | Depressive symptoms [CES-D]                                                  | The interaction of overall health and social support at Time 1 predicted Time 2 depression. For those who lacked social support, overall health was negatively related to depression symptoms 1 year later.                                                                      |
| Houtjes et al., 2017    | n=277 older adults                                                                              | Data of the Longitudinal                                                     | 16 timepoints/                                                                              | Social support                                                              | Depressive symptoms                                                          | A 2-way interaction between depression course types and time showed significant                                                                                                                                                                                                  |



|                                                                                                                                                                                                                                                                                                                                                                                                                                                                                                                                                                                                                                                                                                                                                                            |                                                                                                           |                                                                                                                       |                                                        |                                                                                     |                                                                 |                                                                                                                                                                                                                                                                               |
|----------------------------------------------------------------------------------------------------------------------------------------------------------------------------------------------------------------------------------------------------------------------------------------------------------------------------------------------------------------------------------------------------------------------------------------------------------------------------------------------------------------------------------------------------------------------------------------------------------------------------------------------------------------------------------------------------------------------------------------------------------------------------|-----------------------------------------------------------------------------------------------------------|-----------------------------------------------------------------------------------------------------------------------|--------------------------------------------------------|-------------------------------------------------------------------------------------|-----------------------------------------------------------------|-------------------------------------------------------------------------------------------------------------------------------------------------------------------------------------------------------------------------------------------------------------------------------|
|                                                                                                                                                                                                                                                                                                                                                                                                                                                                                                                                                                                                                                                                                                                                                                            | [Amsterdam]<br>Age: >55                                                                                   | Aging Study Amsterdam (LASA)                                                                                          | observations covering 13 years                         | [Self-reported questionnaire]                                                       | [CES-D]                                                         | differences in instrumental support received over time in older people with a late-life depression.                                                                                                                                                                           |
| Misawa et al., 2019                                                                                                                                                                                                                                                                                                                                                                                                                                                                                                                                                                                                                                                                                                                                                        | n=3464 elderly people [Japan]<br>Age: ≥ 65                                                                | Longitudinal panel data: Part of Aichi Gerontological Evaluation Study (AGES) project                                 | 2 waves. 2003, 2006-2007                               | Social support [Self-reported questionnaire]                                        | Depression [GDS-15]                                             | The frequency of meeting with friends and self-rated health predicted reduced odds of depression in men, while age predicted increased odds in women.                                                                                                                         |
| Noteboom et al., 2016                                                                                                                                                                                                                                                                                                                                                                                                                                                                                                                                                                                                                                                                                                                                                      | n=1085 respondents from health care settings [Netherlands]<br>Age: > 18                                   | Longitudinal cohort study: Netherlands Study of Depression and Anxiety (NESDA)                                        | 2 timepoints<br>T1: baseline<br>T2: 2-year follow-up   | Social support [CPQ]                                                                | Depressive disorders [CIDI]                                     | Contrary to authors' expectations, low perceived support, or the perceived aspects (perceived emotional support or negative aspects of support) are not associated with the development of a new episode of depression after accounting for baseline clinical characteristics |
| Van Den Brink et al., 2018                                                                                                                                                                                                                                                                                                                                                                                                                                                                                                                                                                                                                                                                                                                                                 | n=1474 patients with MDD<br>Sample 1: 1115 patients<br>Sample 2: 359 patients [Netherlands]<br>Age: 18-90 | Data from two cohort studies<br>Sample 1: NESDA<br>Sample 2: Netherlands Study of Depression in Older Persons (NESDO) |                                                        | Social support received from partner and from closest friend or family member [CPQ] | Presence of depression [CIDI]<br>Depression severity [IDS-SR]   | Negative experiences with social support were the only social relational variable, which independently predicted non-remission of depression at follow-up.                                                                                                                    |
| Porter et al., 2017                                                                                                                                                                                                                                                                                                                                                                                                                                                                                                                                                                                                                                                                                                                                                        | n=343 undergraduates and their romantic partners [USA]<br>Age: 18-23                                      | Longitudinal study                                                                                                    | 2 timepoints<br>T1: baseline<br>T2: 12-month follow-up | Perceived social support [MSPSS]                                                    | Social anxiety [SIAS]<br>Depression, anxiety symptoms [DASS-21] | Social anxiety is not associated with less support as rated by observers. Socially anxious individuals received less support from their partners according to participant but not observer report.                                                                            |
| Scardera et al., 2020                                                                                                                                                                                                                                                                                                                                                                                                                                                                                                                                                                                                                                                                                                                                                      | n=1174 emerging adults [Canada]<br>Age: 19-20                                                             | Population-based cohort study: Data from Quebec Longitudinal Study of Child Development                               | 2 timepoints<br>T1: baseline<br>T2: 1 year later       | Perceived social support [SPS-10]                                                   | Depressive symptoms [CES-D]<br>Anxiety symptoms [GAD-7]         | Perceived social support was significantly associated with fewer depressive and anxiety symptoms, and suicide-related outcomes at 1-year follow-up. The magnitude of these associations appears stronger for depressive symptoms compared with anxiety symptoms.              |
| Stafford et al., 2019                                                                                                                                                                                                                                                                                                                                                                                                                                                                                                                                                                                                                                                                                                                                                      | n=7171 people aged 50 and older living in [England]<br>Age: >50                                           | Data from the English Longitudinal Study of Ageing (ELSA)                                                             | 5 waves 2002, 2004, 2006, 2008, 2010                   | Partner/spouse support [3-items questionnaire]                                      | Depressive symptoms [CES-D-8]                                   | Greater increases over time in depressive symptoms were seen in those with lower positive support at baseline. More baseline depressive symptoms predicted greater declines in positive support and greater increases in negative spousal support.                            |
| Steine et al., 2020                                                                                                                                                                                                                                                                                                                                                                                                                                                                                                                                                                                                                                                                                                                                                        | N=506 sexual abuse survivors [Norway]<br>Age: 24-47                                                       | Data from the Longitudinal Investigation of Sexual Abuse (LISA)                                                       | 3 waves over 4-year period                             | Perceived social support [MSPSS]                                                    | Anxiety and depression symptoms [HADS]                          | Cross-lagged panel analyses revealed significant weak reciprocal associations between perceived social support and depression, posttraumatic stress symptoms and anxiety symptoms, but not with insomnia symptoms.                                                            |
| Whitley et al., 2016                                                                                                                                                                                                                                                                                                                                                                                                                                                                                                                                                                                                                                                                                                                                                       | n=667 African American custodial grandmothers [USA]<br>Age: 33-83                                         | Prospective study                                                                                                     | 2 timepoints<br>T1: baseline<br>T2: 12-month follow-up | Social support [FSS]                                                                | Depression severity [BSI]                                       | Social support was a mediator in the association between depressive symptoms and mental health quality of life for older African American grandmothers (55+); however, this same relationship did not hold for their younger counterparts (≤55).                              |
| Zhou et al., 2020                                                                                                                                                                                                                                                                                                                                                                                                                                                                                                                                                                                                                                                                                                                                                          | n=1137 college freshmen [China]<br>Age: ≥ 18                                                              | Panel study                                                                                                           | 3 waves with 1 month interval between each wave        | Perceived Family Support [MSPSS]                                                    | Depression severity [PHQ-9]                                     | Family support in Wave 1 decreased compensatory social networking sites (SNS) use for less introverted freshmen in Wave 2 and further decreased depression in Wave 3.                                                                                                         |
| <p>Checklist: BSI = Brief Symptom Inventory; CES-D = Center for Epidemiological Studies-Depression Scale; CIDI = Composite International Diagnostic Interview; DASS = Depression Anxiety Stress Scale; DCSQ = Demand-Control-Support-Questionnaire; DRRI = Deployment Risk and Resilience Inventory; FSS = Family Support Scale; GAD = Generalized Anxiety Disorder; HADS = Hospital Anxiety and Depression Scale; IDS-SR = Inventory of Depressive Symptomatology Self-Report version; MINI: Mini-International Neuropsychiatric Interview; MSPSS = Multidimensional Scale of Perceived Social Support; PHQ = Patient Health Questionnaire; SCL-CD6 = Symptom Checklist Core Depression Scale; SIAS = Social Interaction Anxiety Scale; SPS = Social Provisions Scale</p> |                                                                                                           |                                                                                                                       |                                                        |                                                                                     |                                                                 |                                                                                                                                                                                                                                                                               |

609  
610  
611

**Table 1b. Characteristics of included studies on social support for pregnant women**

| Reference               | Sample/Setting [Country]                                                                                    | Study Type                                                                               | Follow-up Times                                                                                                                                                                              | Social Support [Measure]                                              | MH Outcome [Measure]                               | Main Findings for Social Support                                                                                                                                                                                                                                                                                                    |
|-------------------------|-------------------------------------------------------------------------------------------------------------|------------------------------------------------------------------------------------------|----------------------------------------------------------------------------------------------------------------------------------------------------------------------------------------------|-----------------------------------------------------------------------|----------------------------------------------------|-------------------------------------------------------------------------------------------------------------------------------------------------------------------------------------------------------------------------------------------------------------------------------------------------------------------------------------|
| Albuja et al., 2017     | n=210 women from two clinics that provide prenatal care [Mexico]<br>Age: 20-44                              | Longitudinal study                                                                       | T1: 3 <sup>rd</sup> trimester<br>T2: 6 months postpartum                                                                                                                                     | Social Support [PDPI-R social support subscale]                       | Depressive symptoms [PHQ-9]                        | Lacking social support during the 3 <sup>rd</sup> trimester of pregnancy was associated with greater depressive symptoms at 6 months in the postpartum, although this relationship depended on the level of endorsement of the traditional female role during pregnancy.                                                            |
| Asselmann et al., 2016  | n=306 expectant mothers sampled from community in gynecological outpatient settings [Germany]<br>Age: 18-40 | Prospective-longitudinal Maternal Anxiety in Relation to Infant Development (MARI) Study | T1: week 10-12 gestation<br>T2: week 22-24 gestation<br>T3: week 35-37 gestation<br>T4: 10 days postpartum<br>T5: 2 months postpartum<br>T6: 4 months postpartum<br>T7: 16 months postpartum | Perceived Social Support [F-SozU K-14]                                | Maternal depressive and anxiety disorders [CIDI-V] | Perceived social support declined from prepartum to postpartum; levels of prepartum and postpartum social support were lower in women with comorbid anxiety and depressive disorders compared to those with pure depressive disorder(s), pure anxiety disorder(s), or comorbid anxiety and depressive disorders prior to pregnancy. |
| Asselmann et al., 2020  |                                                                                                             |                                                                                          |                                                                                                                                                                                              |                                                                       | Depressive, anxiety, and stress symptoms [DASS-21] | Peripartum depressive, anxiety, and stress symptoms were lower in women with higher perceived social support (b = -0.225 to -0.308).                                                                                                                                                                                                |
| Cankurur et al., 2015   | n=730 women from 20 urban and rural antenatal clinics [Turkey]<br>Age: 18-44                                | Cohort study                                                                             | T1: 3 <sup>rd</sup> trimester<br>T2: 2 months after childbirth<br>T3: 6 months after childbirth                                                                                              | Emotional, practical support [CPQ]                                    | Depressive symptoms [EPDS]                         | Worse emotional support from mother-in-law was significantly associated with postnatal depression incidence (OR=0.93, 95% CI 0.87 to 0.99) and worse emotional support from husband with postnatal persistence (OR=0.89, 95% CI 0.83 to 0.96) of antenatal depression.                                                              |
| Chen et al., 2016       | n=203 South Asia immigrant mothers [Taiwan]<br>Age: ≥ 18                                                    | Panel study                                                                              | T1: 1 month postpartum<br>T2: 6 months postpartum<br>T3: 1 year postpartum                                                                                                                   | Emotional, instrumental, informational support [Social Support Scale] | Depressive symptoms [EPDS]                         | Depression and instrumental support followed downward curvilinear trajectories, while emotional and informational support followed upward curvilinear trajectories. Emotional and instrumental support negatively covaried with postpartum depression over time, but not informational support.                                     |
| Chen et al., 2020       | n=407 immigrant and native-born women from obstetrical clinics and hospitals [Taiwan]<br>Age: 20-44         | Prospective study                                                                        | T1: 2 <sup>nd</sup> or 3 <sup>rd</sup> trimester<br>T2: 3 months postpartum                                                                                                                  | Emotional, instrumental, informational support [Social Support Scale] | Depressive symptoms [EPDS]                         | Social support was significantly and negatively associated with postpartum depressive symptoms in both immigrant and the native-born women, and presence of depressive symptomatology during pregnancy and a lower level of social support were associated with an increased depressive symptom score at 3 months postpartum.       |
| Faleschini et al., 2020 | n=1356 women from 8 obstetric offices [USA]<br>Mean age: 32.6                                               | Data from Project Viva, a prospective observational cohort study                         | T1: trimester visits<br>T1: 6 months postpartum                                                                                                                                              | Perceived social support [Turner Support Scale]                       | Depressive symptoms [EPDS]                         | Greater partner support and support from family/friends were strongly associated with lower odds of incident depression (OR 0.33, 95% CI [0.20, 0.55] and OR 0.49, 95% CI [0.30, 0.79]).                                                                                                                                            |
| Gan et al., 2019        | n= 3310 women from antenatal clinics [China]<br>Age: ≥ 20                                                   | Prospective study; Data from Shanghai Birth Cohort                                       | T1: early pregnancy<br>T2: 6 weeks postpartum                                                                                                                                                | Perceived social support [ESSI]                                       | Postpartum depression [EPDS]                       | Significant associations between low perceived social support and postpartum depressive symptoms were found (Model I odds ratio: 1.63, 95% confidence interval: 1.15, 2.30; Model II odds ratio: 1.77, 95% confidence interval: 1.24–2.52).                                                                                         |
| Hare, 2020              | n=144 women at risk for peripartum depression/euthymic [USA]<br>Age: 19-41                                  | Cohort study                                                                             | T1 & T2: Twice antepartum<br>T3 & T4: Twice postpartum                                                                                                                                       | Perceived social support [PSSQ]                                       | Peripartum depression [EPDS]<br>Anxiety [HAM-A]    | Women diagnosed with PND experienced significantly worse mother–infant bonding and social support compared to HCW (p = .001, p = .002, respectively) and to those who were at-risk for but did not develop PND (p = .02, p = .008).                                                                                                 |

|                           |                                                                                               |                                                                                                        |                                                                                                            |                                                                                                      |                                                |                                                                                                                                                                                                                                                                                                                                                                                                                                                                          |
|---------------------------|-----------------------------------------------------------------------------------------------|--------------------------------------------------------------------------------------------------------|------------------------------------------------------------------------------------------------------------|------------------------------------------------------------------------------------------------------|------------------------------------------------|--------------------------------------------------------------------------------------------------------------------------------------------------------------------------------------------------------------------------------------------------------------------------------------------------------------------------------------------------------------------------------------------------------------------------------------------------------------------------|
| Hetherington et al., 2018 | n=3057 women [Canada]<br>Age: $\geq 18$                                                       | Data from the All Our Families longitudinal pregnancy cohort                                           | T1: 4 months postpartum<br>T2: 1 year postpartum                                                           | Support types: tangible, positive social interaction, and emotional/informational support. [MOS-SSS] | Depressive or anxiety symptoms [EPDS]          | Low total social support during pregnancy was associated with increased risk of depressive symptoms (RR 1.50, 95% CI 1.24 to 1.82) and anxiety symptoms (RR 1.63, 95% CI 1.38 to 1.93) at 4 months postpartum. Low total social support at 4 months was associated with increased risk of anxiety symptoms (RR 1.65, 95% CI 1.31 to 2.09) at 1 year. Emotional or informational support was an important type of support for postpartum anxiety.                         |
| Leonard et al., 2020      | n=1316 first time mothers [USA]<br>Age: 18-35                                                 | Longitudinal cohort study                                                                              | 5 Time points: 1, 6, 12, 18, and 24 months postpartum                                                      | Perceived social support [MOS-SSS]                                                                   | Maternal postpartum depressive symptoms [EPDS] | Perceived social support decreased, perceived stress increased, and depressive symptoms remained constant from 1 to 18 months, then increased at 24 months. Low perceived social support predicted 6-month depressive symptoms, whereas perceived stress predicted depressive symptoms at all time points.                                                                                                                                                               |
| Li et al., 2017           | n=240 pregnant women from the prenatal clinic at a general hospital [China]<br>Age: $\geq 18$ | Longitudinal study                                                                                     | T1: late pregnancy<br>T2: 1 week postpartum<br>T3: 4 weeks postpartum                                      | Perceived social support [MSPSS]                                                                     | Antepartum depression [EPDS]                   | Women who had higher Perceived Social Support Scale scores at late pregnancy had less likelihood of developing antepartum depression, and women with higher social support scores at postpartum week 4 were less likely to have postpartum depression. However, the Perceived Social Support Scale scores at late pregnancy did not predict the risk of postpartum depression.                                                                                           |
| Milgrom et al., 2019      | n=54 women who met DSM-IV criteria of MDD or minor depression [Australia]<br>Age: $\geq 18$   | Longitudinal follow-up of a previous RCT for antenatal depression                                      | T1: baseline<br>T2: 9 weeks post-randomization<br>T3: 6 months<br>T4: 9 months<br>T5: 24 months post-birth | Perceived social support [SPS]                                                                       | Depression [BDI-II]<br>Anxiety [BAI]           | Two aspects of social support, reassurance of worth and reliable alliance, were strongly related to perinatal depression and anxiety, particularly when predicting symptoms in late pregnancy. However, the effect of postnatal depression on child development at 9- and 24-months post-birth was not mediated by social support.                                                                                                                                       |
| Morikawa et al., 2015     | n=877 women enrolled in a prepartum program during pregnancy [Japan]<br>Age: $\geq 20$        | Cohort study                                                                                           | T1: before 25 <sup>th</sup> week of gestation<br>T2: 1 month after childbirth                              | Social support [SSQ]                                                                                 | Postpartum depression [EPDS]                   | Having a larger number of people available to provide social support during pregnancy has a greater protective effect on pregnant mothers with than without depression.                                                                                                                                                                                                                                                                                                  |
| Nakamura et al., 2020     | n=12386 couples [France]<br>Age: $\geq 18$                                                    | Data from the French representative ELFE (Etude Longitudinale Française depuis l'Enfance) cohort study | T1: at birth<br>T2: 2 months post-partum<br>T3: 1 year postpartum<br>T4: 2 years post-partum               | Informal and formal support [face-to-face and phone interviews]                                      | Parental postnatal depression [EPDS]           | Insufficient partner support as well as frequent quarrels during pregnancy predicted the odds of both parents being depressed. This association was higher for women with psychological difficulties during pregnancy than those without. An inverse association was also observed between psychosocial risk assessment attendance (informal support) and joint parental PPD, especially in couples in which the mother had psychological difficulties during pregnancy. |
| Ohara et al., 2017        | n=494 pregnant women attending perinatal classes [Japan]<br>Age: $\geq 20$                    | Prospective cohort study                                                                               | T1: early pregnancy before week 25<br>T2: 1 month after delivery                                           | Number of persons and satisfaction with social support [SSQ]                                         | Postpartum depression [EPDS]                   | Satisfaction with the social support received during pregnancy did not directly predict depression in the postpartum period at a statistically significant level. However, poorer satisfaction with the social support received during pregnancy was a cause of depression in the postpartum period due to increased depression during pregnancy.                                                                                                                        |

|                           |                                                                                                      |                                                                  |                                                                                                                                                                                                                                                                                                                                                                                                                       |                                                                                             |                                              |                                                                                                                                                                                                                                                                                                                                                                                                                                                  |
|---------------------------|------------------------------------------------------------------------------------------------------|------------------------------------------------------------------|-----------------------------------------------------------------------------------------------------------------------------------------------------------------------------------------------------------------------------------------------------------------------------------------------------------------------------------------------------------------------------------------------------------------------|---------------------------------------------------------------------------------------------|----------------------------------------------|--------------------------------------------------------------------------------------------------------------------------------------------------------------------------------------------------------------------------------------------------------------------------------------------------------------------------------------------------------------------------------------------------------------------------------------------------|
| Ohara et al., 2018        | n=855 pregnant women attending perinatal classes [Japan]<br>Age: $\geq 20$                           | Cohort study                                                     | T1: early pregnancy before week 25<br>T2: 1 month after delivery                                                                                                                                                                                                                                                                                                                                                      | Number of persons and satisfaction with social support [SSQ]                                | Postpartum depression [EPDS]                 | Bonding failure in the postpartum period was significantly influenced by mothers' own perceived rearing as well as social support during pregnancy. In addition, depression in the postpartum period was strongly influenced by social support during pregnancy                                                                                                                                                                                  |
| Racine et al., 2019       | n=3388 mothers from community, laboratory, and health care clinic offices [Canada]<br>Age: $\geq 18$ | Large, population-based cohort All Our Babies/Families (AOB/AOF) | T1: < 25 weeks gestation<br>T2: 34–36 weeks gestation<br>T3: 4 months postpartum<br>T4: 12 months postpartum                                                                                                                                                                                                                                                                                                          | Perceived social support: [3 questions]                                                     | Prenatal and postpartum anxiety [STAI]       | Women who experience heightened stress and anxiety in the perinatal period relative to their own average levels are at risk of higher anxiety and stress at subsequent time points; within-person increases in partner and friend support are salient predictors of subsequent decreases in both stress and anxiety; increases in stress and anxiety in the perinatal period are at risk of experiencing decreases in friend and family support. |
| Racine et al., 2020       | n=1994 women from health care and laboratory offices [Canada]<br>Age: $\geq 18$                      | Large, population-based cohort All Our Babies/Families (AOB/AOF) | T1: < 25 weeks gestation<br>T2: 4 months postpartum<br>T2: infant age of 36 months                                                                                                                                                                                                                                                                                                                                    | Maternal social support [MOS-SSS]                                                           | Maternal depression [EPDS]                   | Although maternal social support was a significant predictor of maternal depression across the perinatal period, social support did not moderate the association between ACEs and maternal depression.                                                                                                                                                                                                                                           |
| Razurel et al., 2015      | n=235 primiparous mothers [Switzerland]<br>Age: 21-43                                                | Longitudinal study                                               | T1: During the last month of pregnancy and<br>T2: 6 weeks after birth                                                                                                                                                                                                                                                                                                                                                 | Satisfaction with social support [20-items scale constructed in the area of perinatal care] | Depressive symptoms [EPDS]<br>Anxiety [STAI] | Satisfaction with emotional support in T1 was negatively correlated with depressive symptoms in T1 and T2, which suggested that this type of support was important both in the short and the long term.                                                                                                                                                                                                                                          |
| Razurel et al., 2017      | T1: gestational weeks 37-41<br>T2: 2 days post-delivery<br>T3: 6 weeks postpartum                    |                                                                  | The more the women were provided with support from their partners, the less depressive symptoms and elevated levels of anxiety they reported, even under stressful conditions, while the satisfaction of support from their mothers boosted their sense of competency. Satisfaction with emotional support from professionals tempered the stress during the post-partum period ( $\Delta R^2 = 0.032$ ; $p < .05$ ). |                                                                                             |                                              |                                                                                                                                                                                                                                                                                                                                                                                                                                                  |
| Schwab-Reese et al., 2017 | n=195 women from a large hospital [USA]<br>Age: $\geq 18$                                            | Longitudinal study                                               | T1: following birth<br>T2: 3 months after birth<br>T3: 6 months after birth                                                                                                                                                                                                                                                                                                                                           | Perceived social support [MOS-SSS]                                                          | Depressive and anxiety symptoms [DASS-21]    | Current perceptions of social support were associated with depressive and anxiety symptoms at three-months postpartum, but social support was not protective against depressive or anxiety symptoms at six-months postpartum.                                                                                                                                                                                                                    |
| Senturk et al., 2017      | n=730 women recruited in their third trimester [Turkey]<br>Age: 18-44                                | Cohort study                                                     | T1: 3 <sup>rd</sup> trimester<br>T2: 0.8-7.4 months after childbirth<br>T3: 10.8-16.6 months<br>T4: 18.1-23.5 months                                                                                                                                                                                                                                                                                                  | Quality of relationships and social support [CPQ]                                           | Postpartum depression [EPDS]                 | Self-rated emotional and practical support from all three relationships worsened over time in the cohort overall. Emotional support from the husband, and emotional and practical support from the mother-in-law declined more strongly in women with depressive symptoms at baseline                                                                                                                                                            |
| Tani et al., 2017         | n=179 nulliparous pregnant women [Italy]<br>Age: 18-42                                               | Longitudinal study                                               | T1: 31–32 week of pregnancy<br>T2: 1 <sup>st</sup> day after childbirth<br>T3: 1 month after birth                                                                                                                                                                                                                                                                                                                    | Perceived social support [MSSS]                                                             | Postpartum depression [EPDS]                 | Post-partum depression was influenced negatively by maternal perceived social support and positively by negative clinical birth indices. In addition to these direct effects, analyses revealed a significant effect of maternal perceived social support on postpartum depression, mediated by the clinical indices considered.                                                                                                                 |

|                                                                                                                                                                                                                                                                                                                                                                                                                                                                                                                                                                                                                                                                                                                                                                                                                                                                                                                             |                                                                                     |                                                      |                                                                                                           |                                                                                            |                                      |                                                                                                                                                                                                                                                                                                          |
|-----------------------------------------------------------------------------------------------------------------------------------------------------------------------------------------------------------------------------------------------------------------------------------------------------------------------------------------------------------------------------------------------------------------------------------------------------------------------------------------------------------------------------------------------------------------------------------------------------------------------------------------------------------------------------------------------------------------------------------------------------------------------------------------------------------------------------------------------------------------------------------------------------------------------------|-------------------------------------------------------------------------------------|------------------------------------------------------|-----------------------------------------------------------------------------------------------------------|--------------------------------------------------------------------------------------------|--------------------------------------|----------------------------------------------------------------------------------------------------------------------------------------------------------------------------------------------------------------------------------------------------------------------------------------------------------|
| Tsai et al., 2016                                                                                                                                                                                                                                                                                                                                                                                                                                                                                                                                                                                                                                                                                                                                                                                                                                                                                                           | n=1238 pregnant in economically deprived settlements [South Africa] Age: ≥ 18       | Population-based longitudinal study                  | T1: 6 days after birth<br>T2: 6 months post-partum<br>T3: 18 months post-partum<br>T4: 36-month follow-up | Emotional and instrumental support (10 questions about trust and support derived from SOS) | Depression symptom severity [EPDS]   | Social support was found to be an effect modifier of the relationship between food insufficiency and depression symptom severity, consistent with the “buffering” hypothesis. Instrumental support provided buffering against the adverse impacts of food insufficiency while emotional support did not. |
| Yoruk et al., 2020                                                                                                                                                                                                                                                                                                                                                                                                                                                                                                                                                                                                                                                                                                                                                                                                                                                                                                          | N=317 pregnant women at 38 weeks of gestation [Turkey] Age: 23-34                   | Longitudinal study                                   | T1: 4th week postpartum<br>T2: 6th week postpartum                                                        | Perceived social support [MSPSS]                                                           | Postpartum depression [EPDS]         | Despite the low level of perceived social support in the group at risk for PPD, this difference was not significant.                                                                                                                                                                                     |
| Zheng et al., 2018                                                                                                                                                                                                                                                                                                                                                                                                                                                                                                                                                                                                                                                                                                                                                                                                                                                                                                          | n=420 Chinese primiparous women from obstetric wards at hospitals [China] Age: ≥ 18 | Longitudinal study                                   | T1: 6 weeks postnatally<br>T2: 12 weeks postnatally                                                       | Emotional, material, informational, and evaluation of support [PSSS]                       | Postnatal depression symptoms [EPDS] | Postnatal depression symptoms and social support are the important influencing factors of maternal self-efficacy. The mean social support scores and scores of emotional support, informational support and evaluation of support had statistically significant increases over time.                     |
| Zhong et al., 2018                                                                                                                                                                                                                                                                                                                                                                                                                                                                                                                                                                                                                                                                                                                                                                                                                                                                                                          | n=3336 women [Peru] Age: 18-49                                                      | Pregnancy Outcomes, Maternal and Infant Cohort Study | T1: <16 weeks gestation<br>T2: 26–28 weeks gestation                                                      | Satisfaction with social support and number of support providers [SSQ-6]                   | Depressive symptoms [EPDS]           | Low number of support providers at both time points was associated with increased risk of depression (odds ratio = 1.62, 95% confidence interval: 1.12, 2.34). Depression risk was not significantly higher for women who reported high social support at one of the 2 time points.                      |
| <p>Checklist: BAI = Beck Anxiety Inventory; BDI = Beck Depression Inventory; CIDI = Composite International Diagnostic Interview for Women; CPQ = Close Persons Questionnaire DASS = Depression Anxiety Stress Scale; EPDS = Edinburgh Postnatal Depression Scale; ESSI = ENRICH Social Support Instrument; F-SozU K-14 = Brief form of the Perceived Social Support Questionnaire; HAM-A = Hamilton Anxiety Rating Scale; MOS-SSS = Medical Outcomes Study Social Support Survey; MSPSS = Multidimensional Scale of Perceived Social Support; MSSS = Maternal Social Support Scale; PDPI-R = Postpartum Depression Predictors Inventory-Revised; PHQ = Patient Health Questionnaire; PSSQ = Postpartum Social Support Questionnaire; PSSS = Postpartum Social Support Scale; SOS = Significant Others Scale; SPS = Social Provisions Scale; SSQ = Social Support Questionnaire; STAI = Spielberger State Anxiety Scale</p> |                                                                                     |                                                      |                                                                                                           |                                                                                            |                                      |                                                                                                                                                                                                                                                                                                          |

612  
613  
614  
615  
616  
617  
618  
619  
620  
621  
622  
623  
624  
625  
626  
627  
628  
629  
630  
631  
632  
633  
634  
635  
636  
637  
638  
639  
640  
641  
642  
643

644 **Table 2. Characteristics of included studies on social isolation**

| Reference                                                                                                                                                                                                                                                       | Sample/Setting [Country]                                   | Study Type                                                                                            | Follow-up Times                                                 | Social Isolation [Measure]        | MH Outcome [Measure]                                                         | Main Findings for Social Isolation                                                                                                                                                                                                                                                                                                                                       |
|-----------------------------------------------------------------------------------------------------------------------------------------------------------------------------------------------------------------------------------------------------------------|------------------------------------------------------------|-------------------------------------------------------------------------------------------------------|-----------------------------------------------------------------|-----------------------------------|------------------------------------------------------------------------------|--------------------------------------------------------------------------------------------------------------------------------------------------------------------------------------------------------------------------------------------------------------------------------------------------------------------------------------------------------------------------|
| Domènech-Abella et al., 2019                                                                                                                                                                                                                                    | n=5066 adults [Ireland] age ≥50                            | Irish Longitudinal Study on Ageing (TILDA)                                                            | 2 waves of TILDA<br>Second wave: 2012-13<br>Third wave: 2014-15 | UCLA Loneliness Scale             | Major depressive disorder (MDD) or generalized anxiety disorder (GAD) [CIDI] | The longitudinal association between experiencing loneliness and higher likelihood of suffering from GAD two years later is bidirectional, whereas the association between social isolation and higher likelihood of subsequent MDD or GAD as well as those between loneliness and subsequent MDD or deterioration of social integration are unidirectional.             |
| Evans et al., 2019                                                                                                                                                                                                                                              | n=2135 elderly residents [Wales] Age: ≥65                  | Data from the Cognitive Function and Ageing Study–Wales (CFAS-Wales)                                  | 2 timepoints<br>T1: baseline<br>T2: 2-year follow-up            | LSNS-6                            | Depression and anxiety [AGECAT]                                              | Older people with depression or anxiety perceived themselves as more isolated than those without depression or anxiety, despite having an equivalent level of social contact with friends and family. In people with depression or anxiety, social isolation was associated with poor cognitive function at baseline, but not with cognitive change at 2-year follow-up. |
| Herbolsheimer et al., 2018                                                                                                                                                                                                                                      | n=334 community-dwelling older adults [Germany] Age: 65-84 | Longitudinal study                                                                                    | 2 timepoints<br>T1: baseline<br>T2: 3 years later               | LSNS-6                            | Depressive symptoms [HADS]                                                   | Being socially isolated was associated with lower levels of out-of-home physical activity, and this predicted more depressive symptoms after 3 years. However, no direct relationship was observed between social isolation from friends and neighbors at the baseline and depressive symptoms 3 years later.                                                            |
| Holvast et al., 2015                                                                                                                                                                                                                                            | n=285 older adults [Netherlands] Age: ≥ 60                 | Multi-site prospective cohort study from the Netherlands Study of Depression in Older Persons (NESDO) | 2 timepoints<br>T1: baseline<br>T2: 2-year follow-up            | De Jong Gierveld Loneliness scale | Depression [CIDI]<br>Depression severity [IDS-SR]                            | Loneliness, subjective appraisal of social isolation, was a significant positive determinant of depressive symptom severity during follow-up. This association was independent of social network size and persisted after controlling for other potential confounders.                                                                                                   |
| Checklist: AGECAT = Automated Geriatric Examination; CIDI = Composite International Diagnostic Interview; HADS = Hospital Anxiety and Depression Scale; IDS-SR = Inventory of Depressive Symptomatology Self-Report version; LSNS = Lubben Social Network Scale |                                                            |                                                                                                       |                                                                 |                                   |                                                                              |                                                                                                                                                                                                                                                                                                                                                                          |

645  
646  
647  
648  
649  
650  
651  
652  
653  
654  
655  
656  
657  
658

659 **Table 3. Characteristics of included studies on social network**

| Reference                                                                                                                                                                                                                                                                                                                                                                                                                                                             | Sample/Setting [Country]                                                    | Study Type                                                                                    | Follow-up Times                                                                          | Social Network [Measure]                                                                                           | MH Outcome [Measure]                                       | Main Findings for Social Network                                                                                                                                                                                                                                                                                                                                                                |
|-----------------------------------------------------------------------------------------------------------------------------------------------------------------------------------------------------------------------------------------------------------------------------------------------------------------------------------------------------------------------------------------------------------------------------------------------------------------------|-----------------------------------------------------------------------------|-----------------------------------------------------------------------------------------------|------------------------------------------------------------------------------------------|--------------------------------------------------------------------------------------------------------------------|------------------------------------------------------------|-------------------------------------------------------------------------------------------------------------------------------------------------------------------------------------------------------------------------------------------------------------------------------------------------------------------------------------------------------------------------------------------------|
| Chang et al., 2016                                                                                                                                                                                                                                                                                                                                                                                                                                                    | n=21728 elderly women [USA] age: ≥65                                        | Prospective cohort study: Nurses' Health Study (NHS)                                          | 5 timepoints, Baseline and 4 biennial follow-up questionnaire cycles over 10-year period | Berkman-Syme Social Network Index                                                                                  | Depression [MHI-5 subscale of the SF-36, CESD-10, GDS-15]  | Social factors (lower social network; lower subjective social status; high caregiving burden to disabled/ill relatives) were associated with higher incident late-life depression risk in age-adjusted models.                                                                                                                                                                                  |
| Domènech-Abella et al., 2019                                                                                                                                                                                                                                                                                                                                                                                                                                          | n=5066 adults [Ireland] age ≥50                                             | Irish Longitudinal Study on Ageing (TILDA)                                                    | 2 waves of TILDA Second wave: 2012-13 Third wave: 2014-15                                | Berkman-Syme Social Network Index                                                                                  | MDD or GAD [CIDI]                                          | Both objective social isolation (size of social network) and loneliness factors have been found to be robust risk factors for depression and anxiety independently, which acts as a warning not to underestimate the subjective aspects of social isolation.                                                                                                                                    |
| Förster et al., 2018                                                                                                                                                                                                                                                                                                                                                                                                                                                  | n=783 elderly people [Germany] Age: ≥ 75                                    | Population-based cohort study: Leipzig Longitudinal Study of the Aged (LEILA)                 | 3 timepoints T1: baseline T2: follow-up1 T3: follow-up2                                  | PANT                                                                                                               | Depressive symptoms [CES-D]                                | Persons with a restricted social network were more likely to develop depression. Risk of depression was particularly high for elderly with social loss experiences. An integrated social network may buffer the negative effects of loss on depression.                                                                                                                                         |
| Noteboom et al., 2016                                                                                                                                                                                                                                                                                                                                                                                                                                                 | n=1085 respondents from health care settings [Netherlands] Age: > 18        | Longitudinal cohort study: Netherlands Study of Depression and Anxiety (NESDA)                | 2 timepoints T1: baseline T2: 2-year follow-up                                           | Questions on how many relatives, friends or others over the age of 18 years they had regular and important contact | Depressive disorders [CIDI]                                | Structural (network size and partner status) did not predict depression at follow up. The group with a lifetime history of depression reported a smaller social network.                                                                                                                                                                                                                        |
| Van Den Brink et al., 2018                                                                                                                                                                                                                                                                                                                                                                                                                                            | n=1474 patients with a major depressive disorder [Netherlands] Age: 18 - 90 | Data from 2 cohort studies NESDA and Netherlands Study of Depression in Older Persons (NESDO) |                                                                                          | Questions on social network characteristics                                                                        | Presence of depression [CIDI] Depression severity [IDS-SR] | Social network characteristics, such as having a partner and number of persons in one's household, are related to depression course.                                                                                                                                                                                                                                                            |
| Reynolds et al., 2020                                                                                                                                                                                                                                                                                                                                                                                                                                                 | N=3005 elderly people [USA] Age: 57–85                                      | Panel data from National Social Life, Health, and Aging Project (NSHAP)                       | 3 waves 2005, 2010, and 2015 with 5-year intervals between each wave                     | Questions on community-layer, interpersonal-layer, and partner-layer connection                                    | Depressive symptoms [CES-D]                                | Results demonstrate multiple links between social connection and depression, and that the evolution of social networks in older adults is complex, with distinct mechanisms leading to positive and negative outcomes. Specifically, community involvement showed consistent benefits in reducing depression.                                                                                   |
| Santini et al., 2020                                                                                                                                                                                                                                                                                                                                                                                                                                                  |                                                                             |                                                                                               |                                                                                          | Social Disconnectedness Scale                                                                                      | Depressive symptoms [CES-D-ML] Anxiety [HADS-A]            | No evidence that social disconnectedness (ie, having a small network or infrequent social interaction) predicted higher frequencies of depression symptoms at subsequent timepoints ( $\beta=0.003$ ; $p=0.77$ ; data not shown) was found. Social disconnectedness predicted higher amounts of perceived isolation, which in turn predicted higher amounts of depression and anxiety symptoms. |
| Checklist: CES-D = Center for Epidemiological Studies-Depression Scale; CES-D-ML = Center for Epidemiological Studies-Depression Minus Loneliness Scale; CIDI = Composite International Diagnostic Interview; GAD = Generalized Anxiety Disorder; GDS = Geriatric Depression Scale; HADS = Hospital Anxiety and Depression Scale; IDS-SR = Inventory of Depressive Symptomatology Self-Report version; MDD = Major Depressive Disorder; MHI-5 = Mental Health Index-5 |                                                                             |                                                                                               |                                                                                          |                                                                                                                    |                                                            |                                                                                                                                                                                                                                                                                                                                                                                                 |

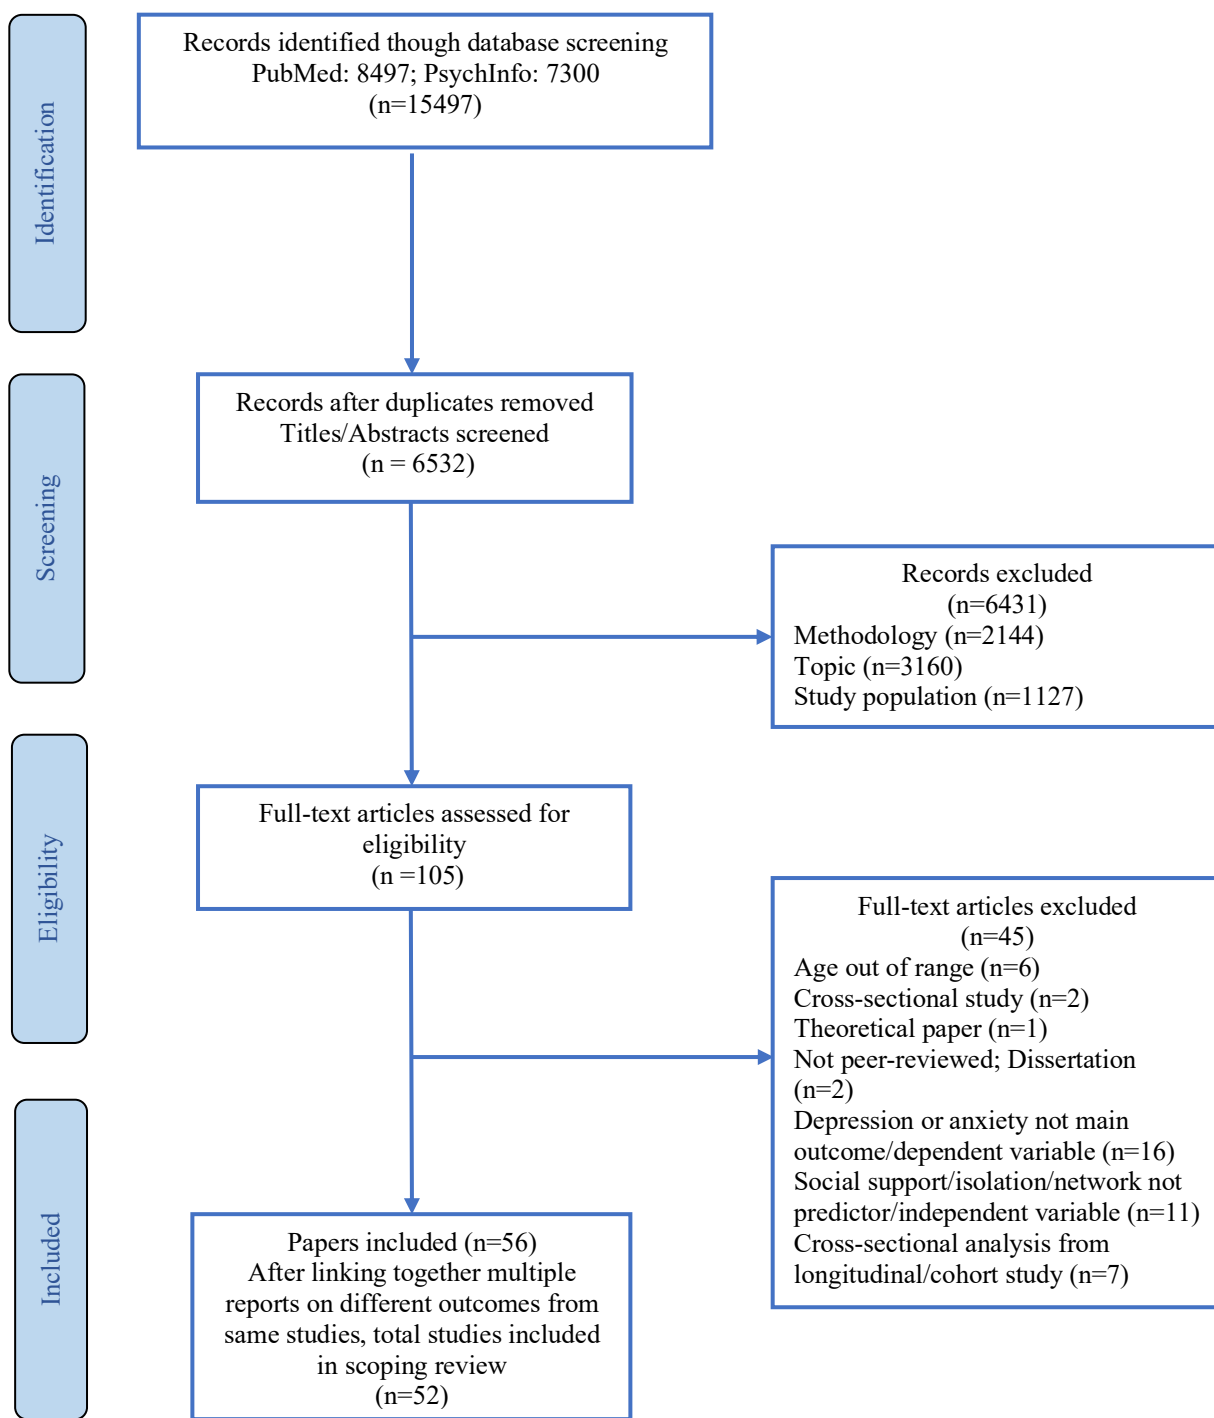

**Lit search strategy:** (((("social\* support \*" or "social\* isolation\*" or "social \*network \*") AND (Depression OR Anxiety)) AND (("2015/1/1"[Date - Publication]: "2020/12/31"[Date - Publication]))) AND (English [Language])

**Fig 1. PRISMA flow chart of the scoping review.** PRISMA diagram showing search and selection process of scoping review.



## Preferred Reporting Items for Systematic reviews and Meta-Analyses extension for Scoping Reviews (PRISMA-ScR) Checklist

| SECTION                           | ITEM | PRISMA-ScR CHECKLIST ITEM                                                                                                                                                                                                                                                 | REPORTED ON PAGE # |
|-----------------------------------|------|---------------------------------------------------------------------------------------------------------------------------------------------------------------------------------------------------------------------------------------------------------------------------|--------------------|
| <b>TITLE</b>                      |      |                                                                                                                                                                                                                                                                           |                    |
| Title                             | 1    | Identify the report as a scoping review.                                                                                                                                                                                                                                  | 1                  |
| <b>ABSTRACT</b>                   |      |                                                                                                                                                                                                                                                                           |                    |
| Structured summary                | 2    | Provide a structured summary that includes (as applicable): background, objectives, eligibility criteria, sources of evidence, charting methods, results, and conclusions that relate to the review questions and objectives.                                             | 2                  |
| <b>INTRODUCTION</b>               |      |                                                                                                                                                                                                                                                                           |                    |
| Rationale                         | 3    | Describe the rationale for the review in the context of what is already known. Explain why the review questions/objectives lend themselves to a scoping review approach.                                                                                                  | 3                  |
| Objectives                        | 4    | Provide an explicit statement of the questions and objectives being addressed with reference to their key elements (e.g., population or participants, concepts, and context) or other relevant key elements used to conceptualize the review questions and/or objectives. | 3                  |
| <b>METHODS</b>                    |      |                                                                                                                                                                                                                                                                           |                    |
| Protocol and registration         | 5    | Indicate whether a review protocol exists; state if and where it can be accessed (e.g., a Web address); and if available, provide registration information, including the registration number.                                                                            | N/A                |
| Eligibility criteria              | 6    | Specify characteristics of the sources of evidence used as eligibility criteria (e.g., years considered, language, and publication status), and provide a rationale.                                                                                                      | 4                  |
| Information sources*              | 7    | Describe all information sources in the search (e.g., databases with dates of coverage and contact with authors to identify additional sources), as well as the date the most recent search was executed.                                                                 | 4                  |
| Search                            | 8    | Present the full electronic search strategy for at least 1 database, including any limits used, such that it could be repeated.                                                                                                                                           | 4                  |
| Selection of sources of evidence† | 9    | State the process for selecting sources of evidence (i.e., screening and eligibility) included in the scoping review.                                                                                                                                                     | 4                  |
| Data charting process‡            | 10   | Describe the methods of charting data from the included sources of evidence                                                                                                                                                                                               | 4-5                |

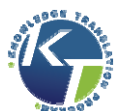

| SECTION                                               | ITEM | PRISMA-ScR CHECKLIST ITEM                                                                                                                                                                                                      | REPORTED ON PAGE #                                                                                                                                    |
|-------------------------------------------------------|------|--------------------------------------------------------------------------------------------------------------------------------------------------------------------------------------------------------------------------------|-------------------------------------------------------------------------------------------------------------------------------------------------------|
|                                                       |      | (e.g., calibrated forms or forms that have been tested by the team before their use, and whether data charting was done independently or in duplicate) and any processes for obtaining and confirming data from investigators. |                                                                                                                                                       |
| Data items                                            | 11   | List and define all variables for which data were sought and any assumptions and simplifications made.                                                                                                                         | 4-5                                                                                                                                                   |
| Critical appraisal of individual sources of evidence§ | 12   | If done, provide a rationale for conducting a critical appraisal of included sources of evidence; describe the methods used and how this information was used in any data synthesis (if appropriate).                          | N/A                                                                                                                                                   |
| Synthesis of results                                  | 13   | Describe the methods of handling and summarizing the data that were charted.                                                                                                                                                   | 5                                                                                                                                                     |
| <b>RESULTS</b>                                        |      |                                                                                                                                                                                                                                |                                                                                                                                                       |
| Selection of sources of evidence                      | 14   | Give numbers of sources of evidence screened, assessed for eligibility, and included in the review, with reasons for exclusions at each stage, ideally using a flow diagram.                                                   | 5 & Fig1                                                                                                                                              |
| Characteristics of sources of evidence                | 15   | For each source of evidence, present characteristics for which data were charted and provide the citations.                                                                                                                    | 5-13                                                                                                                                                  |
| Critical appraisal within sources of evidence         | 16   | If done, present data on critical appraisal of included sources of evidence (see item 12).                                                                                                                                     | N/A                                                                                                                                                   |
| Results of individual sources of evidence             | 17   | For each included source of evidence, present the relevant data that were charted that relate to the review questions and objectives.                                                                                          | 5-13                                                                                                                                                  |
| Synthesis of results                                  | 18   | Summarize and/or present the charting results as they relate to the review questions and objectives.                                                                                                                           | 5-13                                                                                                                                                  |
| <b>DISCUSSION</b>                                     |      |                                                                                                                                                                                                                                |                                                                                                                                                       |
| Summary of evidence                                   | 19   | Summarize the main results (including an overview of concepts, themes, and types of evidence available), link to the review questions and objectives, and consider the relevance to key groups.                                | 13-14                                                                                                                                                 |
| Limitations                                           | 20   | Discuss the limitations of the scoping review process.                                                                                                                                                                         | 15                                                                                                                                                    |
| Conclusions                                           | 21   | Provide a general interpretation of the results with respect to the review questions and objectives, as well as potential implications and/or next steps.                                                                      | 15-16                                                                                                                                                 |
| <b>FUNDING</b>                                        |      |                                                                                                                                                                                                                                |                                                                                                                                                       |
| Funding                                               | 22   | Describe sources of funding for the included sources of evidence, as well as sources of funding for the scoping review. Describe the role of the funders of the scoping review.                                                | We did not include funding sources in the Acknowledgments or anywhere else in the manuscript file as is stated in the guidelines. Funding information |

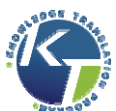

| SECTION | ITEM | PRISMA-ScR CHECKLIST ITEM | REPORTED ON PAGE #                                                        |
|---------|------|---------------------------|---------------------------------------------------------------------------|
|         |      |                           | was entered in the financial disclosure section of the submission system. |

JBI = Joanna Briggs Institute; PRISMA-ScR = Preferred Reporting Items for Systematic reviews and Meta-Analyses extension for Scoping Reviews.

\* Where *sources of evidence* (see second footnote) are compiled from, such as bibliographic databases, social media platforms, and Web sites.

† A more inclusive/heterogeneous term used to account for the different types of evidence or data sources (e.g., quantitative and/or qualitative research, expert opinion, and policy documents) that may be eligible in a scoping review as opposed to only studies. This is not to be confused with *information sources* (see first footnote).

‡ The frameworks by Arksey and O'Malley (6) and Levac and colleagues (7) and the JBI guidance (4, 5) refer to the process of data extraction in a scoping review as data charting.

§ The process of systematically examining research evidence to assess its validity, results, and relevance before using it to inform a decision. This term is used for items 12 and 19 instead of "risk of bias" (which is more applicable to systematic reviews of interventions) to include and acknowledge the various sources of evidence that may be used in a scoping review (e.g., quantitative and/or qualitative research, expert opinion, and policy document).

From: Tricco AC, Lillie E, Zarin W, O'Brien KK, Colquhoun H, Levac D, et al. PRISMA Extension for Scoping Reviews (PRISMA-ScR): Checklist and Explanation. *Ann Intern Med.* ;169:467–473. doi: 10.7326/M18-0850



Source: http://medrxiv.org/content/10.1101/2022.01.26.22269896v1.full.pdf
